# Supplementary material for: Assessment of Validity of Children’s Movement Skill Quotient (CMSQ) Based on the Physical Education Classroom Environment
Source: Hindawi journal article supplement (doi:10.1155/2020/8938763), 2020-01-01
Supplement: f1 [file 8938763.f1.zip]

| id    | sex | age | source | height | weight | CS01 | CS02 | CS03 | CS04 | CS05 | CS06 | CS07 | CS08 | CS09 | CS10 | CS11 | CS12 | CS13 | CS14 |
|-------|-----|-----|--------|--------|--------|------|------|------|------|------|------|------|------|------|------|------|------|------|------|
| CY001 | 1   | 8   | 1      | 134.5  | 26     | 1    | 1    | 0    | 0    | 1    | 1    | 1    | 1    | 0    | 0    | 1    | 1    | 1    | 0    |
| CY002 | 1   | 9   | 1      | 141    | 35     | 1    | 1    | 0    | 0    | 1    | 1    | 0    | 0    | 0    | 1    | 1    | 1    | 1    | 0    |
| CY003 | 2   | 9   | 1      | 141.5  | 27.5   | 1    | 1    | 1    | 0    | 1    | 1    | 1    | 1    | 1    | 0    | 0    | 1    | 1    | 0    |
| CY004 | 2   | 9   | 1      | 135    | 30     | 1    | 1    | 0    | 0    | 0    | 0    | 0    | 1    | 0    | 0    | 1    | 1    | 1    | 0    |
| CY005 | 2   | 9   | 1      | 130    | 32.5   | 1    | 1    | 0    | 0    | 1    | 1    | 1    | 0    | 0    | 1    | 1    | 1    | 1    | 1    |
| CY006 | 1   | 7   | 1      | 126    | 27     | 1    | 1    | 0    | 0    | 1    | 1    | 0    | 0    | 1    | 0    | 1    | 1    | 1    | 0    |
| CY007 | 2   | 9   | 1      | 135.5  | 30     | 1    | 1    | 0    | 1    | 1    | 1    | 1    | 0    | 1    | 1    | 1    | 1    | 1    | 0    |
| CY008 | 1   | 9   | 1      | 138    | 31     | 1    | 1    | 1    | 1    | 1    | 1    | 1    | 1    | 1    | 0    | 1    | 0    | 1    | 0    |
| CY009 | 2   | 9   | 1      | 136.5  | 33.5   | 1    | 1    | 0    | 0    | 0    | 1    | 0    | 0    | 0    | 0    | 1    | 1    | 1    | 0    |
| CY010 | 2   | 8   | 1      | 133.5  | 26     | 1    | 1    | 0    | 1    | 0    | 0    | 1    | 1    | 0    | 1    | 1    | 1    | 1    | 1    |
| CY011 | 2   | 9   | 1      | 134.5  | 33     | 1    | 1    | 0    | 0    | 1    | 1    | 1    | 1    | 0    | 0    | 1    | 1    | 1    | 1    |
| CY012 | 2   | 9   | 1      | 131.5  | 30.5   | 1    | 1    | 0    | 0    | 1    | 1    | 1    | 1    | 1    | 0    | 1    | 1    | 1    | 0    |
| CY013 | 1   | 8   | 1      | 130.5  | 26     | 1    | 1    | 0    | 0    | 1    | 0    | 1    | 1    | 1    | 0    | 0    | 1    | 1    | 0    |
| CY014 | 2   | 7   | 1      | 129    | 30.5   | 1    | 1    | 0    | 1    | 0    | 1    | 0    | 1    | 0    | 0    | 1    | 1    | 1    | 0    |
| CY015 | 2   | 8   | 1      | 128.5  | 25.5   | 1    | 1    | 0    | 0    | 1    | 1    | 0    | 0    | 1    | 0    | 0    | 0    | 1    | 1    |
| CY016 | 2   | 9   | 1      | 131    | 27     | 1    | 1    | 0    | 1    | 1    | 1    | 1    | 1    | 1    | 0    | 1    | 1    | 1    | 0    |
| CY017 | 1   | 9   | 1      | 129    | 24     | 1    | 1    | 0    | 0    | 1    | 1    | 1    | 1    | 0    | 0    | 0    | 1    | 1    | 0    |
| CY018 | 2   | 9   | 1      | 130    | 23.5   | 1    | 1    | 1    | 1    | 1    | 1    | 1    | 1    | 1    | 1    | 1    | 1    | 1    | 0    |
| CY019 | 1   | 7   | 1      | 132.5  | 28     | 1    | 1    | 0    | 1    | 1    | 0    | 1    | 1    | 1    | 1    | 1    | 1    | 1    | 0    |
| CY020 | 1   | 9   | 1      | 136    | 35     | 1    | 1    | 0    | 1    | 1    | 0    | 1    | 0    | 1    | 1    | 1    | 0    | 1    | 0    |
| CY021 | 2   | 9   | 1      | 133.5  | 30.5   | 1    | 1    | 1    | 1    | 0    | 0    | 1    | 1    | 1    | 0    | 1    | 1    | 1    | 0    |
| CY022 | 2   | 8   | 1      | 129    | 23     | 1    | 1    | 1    | 0    | 1    | 1    | 0    | 0    | 0    | 0    | 1    | 1    | 1    | 0    |
| CY023 | 1   | 8   | 1      | 134.5  | 37.5   | 1    | 1    | 0    | 0    | 0    | 1    | 1    | 1    | 0    | 0    | 1    | 0    | 1    | 0    |
| CY024 | 1   | 8   | 1      | 126    | 25     | 1    | 1    | 0    | 0    | 1    | 0    | 0    | 1    | 1    | 0    | 1    | 0    | 1    | 1    |
| CY025 | 2   | 8   | 1      | 126    | 23.5   | 1    | 1    | 0    | 0    | 1    | 1    | 0    | 0    | 0    | 0    | 0    | 1    | 0    | 0    |
| CY026 | 1   | 7   | 1      | 125.5  | 32     | 1    | 1    | 1    | 1    | 0    | 1    | 1    | 1    | 0    | 1    | 1    | 1    | 1    | 0    |
| CY027 | 1   | 9   | 1      | 133.5  | 29     | 1    | 1    | 1    | 0    | 1    | 0    | 0    | 0    | 0    | 0    | 1    | 1    | 0    | 0    |
| CY028 | 1   | 7   | 1      | 123    | 28     | 1    | 1    | 1    | 0    | 1    | 0    | 1    | 0    | 0    | 0    | 1    | 1    | 1    | 0    |
| CY029 | 1   | 6   | 1      | 122.5  | 23     | 1    | 1    | 0    | 0    | 0    | 0    | 1    | 1    | 1    | 0    | 1    | 1    | 1    | 1    |
| CY030 | 1   | 7   | 1      | 128.5  | 22     | 1    | 1    | 1    | 1    | 0    | 0    | 0    | 1    | 0    | 0    | 1    | 1    | 1    | 0    |
| CY031 | 2   | 7   | 1      | 126    | 22     | 0    | 1    | 0    | 1    | 0    | 0    | 1    | 0    | 0    | 0    | 0    | 1    | 1    | 1    |
| CY032 | 1   | 8   | 1      | 129.5  | 28     | 1    | 1    | 0    | 0    | 1    | 0    | 1    | 1    | 1    | 1    | 1    | 1    | 1    | 0    |
| CY033 | 2   | 8   | 1      | 132.5  | 29.5   | 1    | 1    | 0    | 1    | 0    | 1    | 1    | 1    | 0    | 1    | 1    | 1    | 0    | 1    |
| CY034 | 2   | 9   | 1      | 132.5  | 24     | 1    | 1    | 0    | 1    | 1    | 1    | 1    | 1    | 1    | 1    | 1    | 1    | 1    | 0    |
| CY035 | 2   | 7   | 1      | 129.5  | 31     | 1    | 1    | 0    | 1    | 1    | 0    | 1    | 1    | 1    | 0    | 0    | 1    | 1    | 0    |
| CY036 | 2   | 9   | 1      | 131.5  | 27.5   | 1    | 1    | 0    | 1    | 1    | 1    | 1    | 1    | 0    | 0    | 1    | 1    | 1    | 0    |
| CY037 | 2   | 6   | 1      | 126    | 28     | 1    | 1    | 1    | 1    | 0    | 0    | 1    | 1    | 0    | 0    | 0    | 1    | 1    | 0    |
| CY038 | 2   | 9   | 1      | 133.5  | 34     | 1    | 1    | 0    | 1    | 1    | 1    | 1    | 0    | 0    | 0    | 1    | 1    | 1    | 0    |
| CY039 | 1   | 6   | 1      | 119.5  | 21.5   | 1    | 1    | 0    | 1    | 0    | 1    | 1    | 1    | 0    | 0    | 0    | 1    | 1    | 0    |
| CY040 | 2   | 8   | 1      | 125    | 26.5   | 1    | 1    | 0    | 1    | 1    | 1    | 1    | 1    | 0    | 0    | 1    | 1    | 1    | 0    |
| CY041 | 1   | 9   | 1      | 143    | 30     | 1    | 1    | 0    | 1    | 1    | 1    | 1    | 1    | 0    | 0    | 1    | 1    | 1    | 0    |
| CY042 | 2   | 9   | 1      | 125.5  | 23.5   | 1    | 1    | 0    | 0    | 0    | 1    | 0    | 1    | 0    | 0    | 1    | 1    | 1    | 0    |
| CY043 | 2   | 6   | 1      | 120    | 22.5   | 1    | 1    | 0    | 1    | 1    | 0    | 0    | 1    | 1    | 1    | 0    | 1    | 1    | 0    |
| CY044 | 2   | 9   | 1      | 141.5  | 32     | 1    | 1    | 1    | 0    | 0    | 0    | 1    | 0    | 1    | 1    | 1    | 1    | 1    | 0    |
| CY045 | 1   | 8   | 1      | 138    | 35     | 1    | 1    | 0    | 1    | 1    | 1    | 1    | 1    | 0    | 0    | 1    | 1    | 1    | 0    |
| CY046 | 1   | 9   | 1      | 150    | 40     | 1    | 1    | 1    | 1    | 0    | 0    | 1    | 1    | 0    | 1    | 1    | 1    | 1    | 0    |
| CY047 | 2   | 8   | 1      | 137    | 32.5   | 1    | 1    | 1    | 0    | 1    | 0    | 0    | 1    | 1    | 0    | 0    | 1    | 1    | 0    |
| CY048 | 2   | 9   | 1      | 132.5  | 39     | 1    | 1    | 1    | 1    | 1    | 0    | 1    | 1    | 1    | 0    | 1    | 1    | 1    | 0    |
| CY049 | 2   | 9   | 1      | 133.5  | 24.5   | 1    | 1    | 0    | 1    | 0    | 1    | 1    | 1    | 0    | 0    | 0    | 1    | 1    | 0    |
| CY050 | 1   | 9   | 1      | 134    | 31     | 1    | 1    | 0    | 1    | 1    | 1    | 1    | 0    | 1    | 0    | 1    | 1    | 1    | 0    |
| CY051 | 1   | 6   | 1      | 118    | 26     | 1    | 1    | 0    | 1    | 1    | 0    | 1    | 0    | 0    | 0    | 1    | 1    | 1    | 0    |
| CY052 | 1   | 9   | 1      | 139    | 36     | 0    | 1    | 0    | 1    | 1    | 0    | 0    | 1    | 0    | 1    | 1    | 1    | 1    | 0    |
| CY053 | 2   | 7   | 1      | 134.5  | 29.5   | 1    | 0    | 0    | 1    | 0    | 1    | 0    | 0    | 0    | 0    | 0    | 1    | 0    | 0    |
| CY054 | 2   | 6   | 1      | 122    | 24.5   | 1    | 0    | 0    | 1    | 1    | 1    | 1    | 1    | 1    | 1    | 1    | 1    | 1    | 0    |
| CY055 | 1   | 9   | 1      | 138    | 29     | 1    | 1    | 1    | 0    | 1    | 0    | 0    | 0    | 1    | 0    | 1    | 0    | 0    | 0    |
| CY056 | 2   | 9   | 1      | 135.5  | 28.5   | 1    | 1    | 0    | 1    | 1    | 1    | 0    | 1    | 0    | 0    | 0    | 1    | 1    | 0    |
| CY057 | 1   | 8   | 1      | 130.5  | 21.5   | 1    | 1    | 0    | 0    | 1    | 1    | 1    | 1    | 0    | 0    | 1    | 1    | 1    | 1    |
| CY058 | 2   | 7   | 1      | 132.5  | 37.5   | 1    | 1    | 0    | 1    | 0    | 1    | 0    | 0    | 0    | 1    | 0    | 1    | 1    | 0    |
| CY059 | 1   | 8   | 1      | 132.5  | 30     | 1    | 1    | 1    | 1    | 0    | 1    | 1    | 1    | 0    | 0    | 1    | 1    | 1    | 0    |
| CY060 | 2   | 6   | 1      | 120    | 23     | 1    | 1    | 0    | 0    | 1    | 1    | 1    | 1    | 1    | 0    | 0    | 1    | 1    | 0    |
| CY061 | 1   | 7   | 1      | 132.5  | 29.5   | 1    | 1    | 0    | 0    | 1    | 1    | 1    | 1    | 0    | 0    | 1    | 1    | 0    | 0    |
| CY063 | 2   | 7   | 1      | 127.5  | 28.5   | 1    | 1    | 1    | 1    | 0    | 1    | 0    | 0    | 1    | 0    | 1    | 1    | 1    | 0    |
| CY064 | 1   | 7   | 1      | 131.5  | 27.5   | 1    | 1    | 0    | 1    | 1    | 1    | 1    | 1    | 1    | 1    | 1    | 1    | 1    | 1    |
| CY065 | 2   | 6   | 1      | 117    | 21.5   | 1    | 1    | 1    | 1    | 0    | 1    | 1    | 1    | 0    | 1    | 0    | 1    | 0    | 0    |
| CY066 | 2   | 6   | 1      | 122    | 23.5   | 1    | 1    | 0    | 0    | 0    | 0    | 1    | 1    | 1    | 1    | 1    | 1    | 1    | 0    |
| CY067 | 1   | 9   | 1      | 130    | 31     | 1    | 1    | 1    | 1    | 0    | 1    | 1    | 1    | 1    | 0    | 1    | 1    | 1    | 0    |

|       |   |   |   |       |      |   |   |   |   |   |   |   |   |   |   |   |   |   |
|-------|---|---|---|-------|------|---|---|---|---|---|---|---|---|---|---|---|---|---|
| CY068 | 1 | 8 | 1 | 125.5 | 25   | 1 | 0 | 0 | 1 | 0 | 1 | 1 | 1 | 1 | 1 | 1 | 0 | 0 |
| CY069 | 1 | 9 | 1 | 134   | 34.5 | 1 | 1 | 0 | 0 | 0 | 1 | 0 | 0 | 0 | 1 | 1 | 1 | 1 |
| CY070 | 2 | 9 | 1 | 138.5 | 36   | 1 | 1 | 0 | 1 | 0 | 1 | 1 | 1 | 1 | 1 | 1 | 1 | 1 |
| CY071 | 2 | 8 | 1 | 129.5 | 31.5 | 1 | 1 | 0 | 0 | 1 | 0 | 0 | 0 | 1 | 1 | 1 | 0 | 0 |
| CY072 | 1 | 8 | 1 | 137   | 35   | 1 | 1 | 0 | 1 | 0 | 0 | 0 | 0 | 0 | 1 | 1 | 1 | 1 |
| CY073 | 1 | 6 | 1 | 122.5 | 25   | 1 | 1 | 0 | 0 | 0 | 0 | 1 | 0 | 1 | 1 | 1 | 0 | 1 |
| CY074 | 1 | 8 | 1 | 128   | 26   | 1 | 1 | 0 | 0 | 1 | 1 | 0 | 1 | 0 | 0 | 0 | 1 | 0 |
| CY075 | 1 | 8 | 1 | 125   | 20.5 | 1 | 1 | 0 | 0 | 1 | 1 | 1 | 0 | 0 | 0 | 0 | 0 | 0 |
| CY076 | 1 | 7 | 1 | 131.5 | 32   | 1 | 1 | 0 | 1 | 0 | 1 | 0 | 1 | 0 | 0 | 1 | 1 | 0 |
| CY077 | 2 | 7 | 1 | 126   | 25.5 | 1 | 1 | 0 | 0 | 0 | 0 | 0 | 0 | 0 | 0 | 0 | 0 | 0 |
| CY078 | 1 | 7 | 1 | 120   | 24   | 1 | 1 | 0 | 0 | 1 | 1 | 1 | 0 | 0 | 0 | 1 | 0 | 1 |
| CY079 | 1 | 6 | 1 | 114.5 | 19   | 1 | 1 | 0 | 0 | 0 | 1 | 0 | 0 | 0 | 0 | 1 | 1 | 0 |
| CY080 | 1 | 7 | 1 | 130.5 | 28.5 | 1 | 1 | 0 | 0 | 0 | 1 | 0 | 0 | 0 | 0 | 0 | 1 | 0 |
| CY081 | 2 | 7 | 1 | 123   | 27.5 | 1 | 1 | 0 | 1 | 1 | 0 | 1 | 1 | 0 | 0 | 0 | 1 | 0 |
| CY082 | 2 | 6 | 1 | 118.5 | 22.5 | 1 | 1 | 0 | 1 | 0 | 1 | 0 | 1 | 0 | 0 | 1 | 0 | 0 |
| CY083 | 1 | 6 | 1 | 122.5 | 22   | 1 | 1 | 0 | 0 | 0 | 1 | 0 | 1 | 0 | 0 | 1 | 0 | 0 |
| CY084 | 2 | 9 | 1 | 135.5 | 32.5 | 1 | 0 | 0 | 0 | 0 | 0 | 0 | 1 | 0 | 0 | 0 | 1 | 0 |
| CY085 | 2 | 7 | 1 | 124   | 27.5 | 1 | 1 | 1 | 0 | 0 | 1 | 1 | 0 | 0 | 0 | 1 | 1 | 0 |
| CY086 | 2 | 9 | 1 | 136.5 | 32   | 1 | 1 | 0 | 1 | 1 | 0 | 0 | 0 | 0 | 0 | 1 | 1 | 0 |
| CY087 | 1 | 9 | 1 | 136.5 | 32   | 1 | 1 | 0 | 1 | 0 | 1 | 0 | 0 | 0 | 0 | 1 | 1 | 0 |
| CY088 | 1 | 8 | 1 | 128   | 24   | 1 | 1 | 0 | 0 | 0 | 1 | 1 | 1 | 0 | 1 | 1 | 1 | 0 |
| CY089 | 2 | 7 | 1 | 125   | 24.5 | 1 | 1 | 0 | 0 | 1 | 1 | 1 | 1 | 0 | 1 | 1 | 1 | 0 |
| CY090 | 1 | 6 | 1 | 113.5 | 21   | 1 | 1 | 0 | 0 | 1 | 1 | 1 | 1 | 0 | 0 | 1 | 0 | 0 |
| CY091 | 2 | 7 | 1 | 125   | 27.5 | 0 | 1 | 0 | 1 | 1 | 1 | 0 | 1 | 0 | 0 | 1 | 1 | 1 |
| CY092 | 1 | 9 | 1 | 134.5 | 33   | 1 | 1 | 0 | 1 | 0 | 0 | 1 | 1 | 0 | 0 | 1 | 1 | 0 |
| CY093 | 1 | 9 | 1 | 138   | 34   | 1 | 1 | 0 | 1 | 0 | 0 | 1 | 0 | 0 | 0 | 1 | 0 | 1 |
| CY094 | 1 | 7 | 1 | 132.5 | 28.5 | 1 | 1 | 0 | 1 | 0 | 1 | 1 | 0 | 1 | 0 | 1 | 1 | 0 |
| CY095 | 1 | 8 | 1 | 127.5 | 26   | 1 | 1 | 1 | 0 | 1 | 1 | 0 | 0 | 0 | 0 | 1 | 1 | 0 |
| CY096 | 1 | 9 | 1 | 137   | 32   | 1 | 1 | 0 | 1 | 0 | 1 | 0 | 1 | 0 | 0 | 1 | 0 | 0 |
| CY097 | 2 | 6 | 1 | 120   | 27.5 | 1 | 1 | 0 | 1 | 0 | 1 | 0 | 1 | 0 | 0 | 0 | 1 | 0 |
| CY098 | 1 | 7 | 1 | 129.5 | 26   | 1 | 1 | 1 | 1 | 0 | 0 | 1 | 0 | 1 | 1 | 1 | 1 | 0 |
| CY099 | 2 | 7 | 1 | 126   | 27.3 | 1 | 1 | 0 | 1 | 1 | 1 | 1 | 1 | 0 | 0 | 1 | 1 | 0 |
| CY100 | 2 | 6 | 1 | 106   | 20   | 1 | 1 | 0 | 1 | 1 | 1 | 0 | 1 | 0 | 0 | 0 | 1 | 0 |
| CY101 | 1 | 7 | 1 | 131.5 | 31.5 | 1 | 1 | 0 | 0 | 1 | 1 | 0 | 1 | 0 | 1 | 0 | 1 | 1 |
| CY102 | 2 | 9 | 1 | 133.5 | 27   | 0 | 1 | 0 | 0 | 0 | 1 | 1 | 1 | 0 | 0 | 0 | 1 | 1 |
| CY103 | 2 | 6 | 1 | 119   | 28   | 1 | 1 | 0 | 0 | 0 | 1 | 1 | 0 | 1 | 0 | 1 | 1 | 1 |
| CY104 | 1 | 9 | 1 | 131   | 25   | 1 | 1 | 0 | 0 | 1 | 1 | 1 | 1 | 0 | 0 | 1 | 1 | 1 |
| CY105 | 2 | 9 | 1 | 135.5 | 27   | 1 | 1 | 0 | 1 | 0 | 1 | 1 | 0 | 1 | 0 | 1 | 1 | 0 |
| CY106 | 1 | 6 | 1 | 122.5 | 24   | 1 | 1 | 0 | 1 | 1 | 0 | 0 | 1 | 0 | 0 | 0 | 1 | 0 |
| CY107 | 2 | 8 | 1 | 127   | 20   | 1 | 1 | 0 | 0 | 1 | 0 | 0 | 0 | 0 | 0 | 1 | 1 | 0 |
| CY108 | 1 | 6 | 1 | 120.5 | 20   | 1 | 1 | 1 | 1 | 0 | 0 | 1 | 0 | 0 | 0 | 1 | 1 | 0 |
| CY109 | 2 | 7 | 1 | 127   | 26.5 | 1 | 1 | 0 | 1 | 1 | 1 | 1 | 1 | 1 | 0 | 1 | 1 | 0 |
| CY110 | 2 | 9 | 1 | 129.5 | 26   | 1 | 1 | 1 | 1 | 0 | 1 | 1 | 1 | 1 | 0 | 1 | 1 | 1 |
| CY111 | 2 | 6 | 1 | 122   | 22   | 1 | 1 | 1 | 0 | 1 | 1 | 1 | 1 | 1 | 1 | 1 | 1 | 1 |
| CY112 | 1 | 6 | 1 | 122   | 23.5 | 1 | 1 | 0 | 0 | 0 | 1 | 1 | 1 | 0 | 1 | 1 | 1 | 0 |
| CY113 | 1 | 8 | 1 | 134   | 26   | 1 | 1 | 0 | 1 | 0 | 1 | 1 | 1 | 1 | 0 | 1 | 1 | 0 |
| CY114 | 1 | 8 | 1 | 132   | 25.5 | 1 | 1 | 0 | 0 | 0 | 1 | 0 | 1 | 0 | 0 | 1 | 1 | 0 |
| CY115 | 2 | 6 | 1 | 119   | 21.5 | 1 | 1 | 0 | 0 | 0 | 1 | 1 | 1 | 0 | 0 | 0 | 1 | 0 |
| CY116 | 1 | 9 | 1 | 135   | 28   | 1 | 1 | 0 | 1 | 0 | 1 | 1 | 1 | 1 | 0 | 1 | 1 | 1 |
| CY117 | 2 | 7 | 1 | 123.5 | 24.5 | 1 | 1 | 0 | 1 | 1 | 1 | 0 | 1 | 1 | 0 | 1 | 1 | 0 |
| CY118 | 1 | 8 | 1 | 130   | 25   | 1 | 1 | 0 | 1 | 0 | 1 | 1 | 1 | 1 | 1 | 1 | 1 | 1 |
| CY119 | 2 | 8 | 1 | 136.5 | 33.5 | 1 | 1 | 0 | 0 | 1 | 0 | 0 | 0 | 0 | 0 | 1 | 0 | 1 |
| CY120 | 1 | 9 | 1 | 131   | 31   | 1 | 1 | 0 | 0 | 1 | 1 | 1 | 0 | 0 | 0 | 0 | 0 | 0 |
| CY121 | 2 | 9 | 1 | 133.5 | 29.5 | 1 | 1 | 0 | 0 | 1 | 1 | 1 | 1 | 0 | 1 | 1 | 1 | 1 |
| CY122 | 2 | 7 | 1 | 127.5 | 23.5 | 1 | 1 | 0 | 0 | 0 | 1 | 0 | 0 | 0 | 0 | 0 | 1 | 0 |
| CY123 | 2 | 7 | 1 | 125.5 | 21   | 1 | 1 | 0 | 0 | 1 | 1 | 0 | 1 | 0 | 0 | 0 | 1 | 0 |
| CY124 | 2 | 7 | 1 | 126   | 22   | 1 | 1 | 1 | 0 | 1 | 1 | 1 | 1 | 1 | 1 | 0 | 1 | 1 |
| CY125 | 2 | 6 | 1 | 115   | 18   | 1 | 1 | 0 | 0 | 0 | 0 | 0 | 0 | 0 | 0 | 1 | 0 | 0 |
| CY126 | 1 | 8 | 1 | 136   | 28.5 | 1 | 1 | 1 | 1 | 1 | 1 | 1 | 1 | 0 | 1 | 1 | 1 | 0 |
| CY127 | 2 | 8 | 1 | 129.5 | 30   | 1 | 1 | 1 | 1 | 0 | 1 | 1 | 1 | 1 | 0 | 1 | 1 | 0 |
| CY128 | 1 | 9 | 1 | 130   | 29   | 1 | 1 | 1 | 1 | 1 | 1 | 0 | 1 | 1 | 1 | 1 | 1 | 1 |
| CY129 | 1 | 9 | 1 | 148   | 30   | 1 | 1 | 1 | 1 | 1 | 1 | 1 | 1 | 0 | 1 | 1 | 1 | 0 |
| CY130 | 2 | 8 | 1 | 133   | 32.5 | 1 | 0 | 0 | 1 | 0 | 1 | 1 | 0 | 1 | 0 | 1 | 1 | 0 |
| CY131 | 2 | 8 | 1 | 132   | 28   | 1 | 1 | 0 | 0 | 1 | 1 | 1 | 1 | 0 | 0 | 1 | 0 | 0 |
| CY132 | 1 | 9 | 1 | 147   | 46   | 1 | 1 | 1 | 1 | 1 | 1 | 1 | 1 | 1 | 1 | 1 | 1 | 1 |
| CY133 | 1 | 7 | 1 | 125.5 | 27   | 1 | 1 | 1 | 1 | 1 | 1 | 1 | 1 | 1 | 1 | 1 | 1 | 1 |
| CY134 | 2 | 8 | 1 | 127   | 22.5 | 1 | 1 | 1 | 1 | 1 | 1 | 1 | 0 | 0 | 0 | 1 | 0 | 0 |
| CY135 | 1 | 7 | 1 | 125.5 | 21.5 | 1 | 1 | 0 | 0 | 0 | 1 | 0 | 0 | 0 | 0 | 0 | 1 | 0 |
| CY136 | 2 | 9 | 1 | 128   | 30.5 | 1 | 1 | 1 | 1 | 1 | 1 | 0 | 1 | 1 | 1 | 1 | 1 | 1 |

|       |   |   |   |       |      |   |   |   |   |   |   |   |   |   |   |   |   |   |   |
|-------|---|---|---|-------|------|---|---|---|---|---|---|---|---|---|---|---|---|---|---|
| CY137 | 1 | 9 | 1 | 141   | 41   | 1 | 1 | 0 | 0 | 0 | 1 | 0 | 0 | 0 | 0 | 1 | 0 | 0 | 0 |
| CY138 | 1 | 6 | 1 | 126.5 | 27   | 1 | 1 | 1 | 1 | 0 | 0 | 1 | 1 | 0 | 0 | 0 | 1 | 1 | 0 |
| CY139 | 1 | 6 | 1 | 115   | 21   | 0 | 0 | 0 | 0 | 0 | 0 | 0 | 0 | 0 | 0 | 0 | 0 | 0 | 0 |
| CY140 | 1 | 7 | 1 | 125.5 | 24   | 1 | 0 | 0 | 1 | 1 | 0 | 0 | 0 | 0 | 0 | 1 | 0 | 0 | 0 |
| CY141 | 1 | 6 | 1 | 119   | 23   | 1 | 1 | 1 | 1 | 1 | 1 | 1 | 1 | 1 | 1 | 1 | 1 | 0 | 1 |
| CY142 | 1 | 7 | 1 | 118.5 | 26   | 1 | 1 | 1 | 1 | 1 | 1 | 0 | 1 | 1 | 1 | 1 | 1 | 1 | 1 |
| CY143 | 1 | 7 | 1 | 129.5 | 30   | 1 | 1 | 1 | 1 | 1 | 1 | 1 | 1 | 1 | 1 | 1 | 1 | 1 | 1 |
| CY144 | 1 | 9 | 1 | 137   | 37.5 | 1 | 1 | 0 | 0 | 1 | 1 | 1 | 1 | 0 | 0 | 1 | 1 | 1 | 0 |
| CY145 | 2 | 6 | 1 | 114   | 17.5 | 0 | 0 | 0 | 0 | 0 | 0 | 0 | 0 | 0 | 0 | 0 | 0 | 0 | 0 |
| CY146 | 2 | 8 | 1 | 121.5 | 23.5 | 1 | 1 | 0 | 1 | 0 | 1 | 1 | 1 | 1 | 0 | 1 | 1 | 1 | 0 |
| CY147 | 1 | 8 | 1 | 128   | 26   | 1 | 1 | 0 | 1 | 1 | 1 | 1 | 1 | 0 | 0 | 1 | 1 | 1 | 1 |
| CY148 | 2 | 9 | 1 | 134.5 | 33.5 | 1 | 0 | 0 | 1 | 0 | 1 | 0 | 1 | 0 | 0 | 0 | 1 | 0 | 0 |
| CY149 | 1 | 8 | 1 | 135.5 | 30.5 | 1 | 1 | 0 | 1 | 0 | 0 | 1 | 0 | 0 | 0 | 1 | 1 | 0 | 0 |
| CY150 | 1 | 7 | 1 | 129.5 | 27   | 1 | 1 | 0 | 1 | 1 | 0 | 0 | 0 | 0 | 0 | 1 | 1 | 1 | 0 |
| CY151 | 1 | 7 | 1 | 129.5 | 33   | 1 | 0 | 0 | 0 | 0 | 1 | 0 | 0 | 1 | 0 | 1 | 0 | 0 | 0 |
| CY152 | 2 | 7 | 1 | 123   | 25.5 | 0 | 1 | 0 | 0 | 1 | 0 | 1 | 0 | 0 | 0 | 0 | 1 | 1 | 0 |
| CY153 | 1 | 7 | 1 | 122   | 23.5 | 1 | 1 | 1 | 0 | 0 | 1 | 1 | 0 | 1 | 1 | 1 | 1 | 1 | 1 |
| CY154 | 1 | 7 | 1 | 125.5 | 23   | 1 | 1 | 0 | 0 | 0 | 0 | 0 | 1 | 0 | 0 | 1 | 1 | 1 | 0 |
| CY155 | 1 | 7 | 1 | 131.5 | 31   | 0 | 1 | 0 | 1 | 0 | 0 | 1 | 0 | 0 | 0 | 0 | 1 | 1 | 1 |
| CY156 | 1 | 7 | 1 | 123   | 26   | 1 | 1 | 0 | 1 | 0 | 1 | 0 | 0 | 0 | 1 | 1 | 1 | 1 | 0 |
| CY157 | 2 | 6 | 1 | 117.5 | 21.5 | 0 | 1 | 0 | 1 | 0 | 0 | 1 | 0 | 0 | 0 | 0 | 1 | 1 | 1 |
| CY158 | 1 | 7 | 1 | 125.5 | 25   | 1 | 1 | 0 | 1 | 0 | 0 | 1 | 0 | 0 | 0 | 0 | 0 | 0 | 0 |
| CY159 | 1 | 7 | 1 | 125.5 | 26   | 1 | 0 | 0 | 1 | 0 | 1 | 0 | 0 | 0 | 0 | 0 | 1 | 0 | 0 |
| CY160 | 1 | 9 | 1 | 143   | 26   | 1 | 1 | 1 | 1 | 1 | 1 | 1 | 1 | 1 | 1 | 1 | 1 | 1 | 0 |
| CY161 | 1 | 7 | 1 | 122.5 | 20   | 1 | 1 | 1 | 1 | 1 | 1 | 0 | 1 | 1 | 0 | 1 | 1 | 1 | 1 |
| CY162 | 1 | 9 | 1 | 132.5 | 32   | 1 | 0 | 0 | 0 | 0 | 0 | 0 | 0 | 0 | 0 | 0 | 0 | 0 | 0 |
| CY163 | 1 | 7 | 1 | 124.5 | 21.5 | 1 | 1 | 0 | 0 | 0 | 0 | 0 | 0 | 0 | 0 | 0 | 0 | 0 | 0 |
| CY164 | 2 | 7 | 1 | 123.5 | 21.5 | 0 | 1 | 0 | 0 | 0 | 1 | 0 | 0 | 0 | 0 | 1 | 0 | 1 | 0 |
| CY165 | 2 | 7 | 1 | 118   | 20.5 | 1 | 1 | 0 | 0 | 1 | 0 | 0 | 0 | 0 | 0 | 1 | 1 | 0 | 0 |
| CY166 | 1 | 6 | 1 | 120.5 | 22   | 1 | 1 | 0 | 0 | 0 | 0 | 0 | 0 | 0 | 0 | 0 | 0 | 0 | 0 |
| CY167 | 2 | 8 | 1 | 123.5 | 20   | 1 | 1 | 0 | 1 | 0 | 1 | 1 | 1 | 1 | 0 | 1 | 1 | 1 | 1 |
| CY168 | 2 | 8 | 1 | 127   | 25   | 1 | 1 | 1 | 1 | 1 | 1 | 1 | 1 | 0 | 1 | 1 | 1 | 1 | 0 |
| CY169 | 1 | 7 | 1 | 131   | 34   | 1 | 1 | 0 | 0 | 0 | 1 | 1 | 1 | 0 | 0 | 0 | 1 | 0 | 1 |
| CY170 | 1 | 9 | 1 | 137.5 | 28   | 1 | 1 | 0 | 1 | 0 | 1 | 1 | 1 | 1 | 0 | 1 | 1 | 1 | 1 |
| CY171 | 1 | 8 | 1 | 137.5 | 40.5 | 1 | 1 | 0 | 1 | 1 | 0 | 0 | 0 | 0 | 0 | 1 | 1 | 1 | 0 |
| CY172 | 1 | 7 | 1 | 129   | 32.5 | 1 | 1 | 0 | 1 | 0 | 0 | 1 | 0 | 0 | 0 | 1 | 1 | 0 | 0 |
| CY173 | 2 | 6 | 1 | 117.5 | 22   | 1 | 1 | 0 | 1 | 0 | 1 | 1 | 1 | 1 | 0 | 1 | 0 | 0 | 0 |
| CY174 | 1 | 9 | 1 | 139   | 41.5 | 1 | 1 | 0 | 0 | 0 | 1 | 0 | 0 | 0 | 0 | 0 | 1 | 0 | 0 |
| CY175 | 2 | 9 | 1 | 126.5 | 31   | 1 | 0 | 0 | 0 | 0 | 0 | 0 | 1 | 0 | 0 | 0 | 1 | 0 | 1 |
| CY176 | 1 | 6 | 1 | 121.5 | 21.5 | 1 | 0 | 0 | 1 | 0 | 1 | 0 | 0 | 0 | 0 | 0 | 1 | 0 | 0 |
| CY177 | 2 | 8 | 1 | 125   | 25.5 | 1 | 1 | 0 | 1 | 1 | 1 | 1 | 1 | 1 | 0 | 1 | 1 | 1 | 1 |
| CY178 | 1 | 7 | 1 | 122   | 26   | 1 | 1 | 0 | 1 | 1 | 1 | 1 | 1 | 1 | 1 | 1 | 1 | 1 | 1 |
| CY179 | 2 | 7 | 1 | 127   | 26.5 | 1 | 1 | 0 | 0 | 0 | 0 | 0 | 0 | 1 | 0 | 1 | 1 | 0 | 0 |
| CY180 | 2 | 8 | 1 | 130   | 29.5 | 0 | 1 | 0 | 0 | 1 | 0 | 1 | 0 | 0 | 0 | 1 | 1 | 1 | 0 |
| CY181 | 1 | 9 | 1 | 132   | 24   | 1 | 0 | 0 | 0 | 0 | 0 | 0 | 0 | 0 | 0 | 1 | 1 | 1 | 0 |
| CY182 | 1 | 7 | 1 | 121.5 | 20   | 1 | 0 | 0 | 1 | 0 | 0 | 0 | 0 | 0 | 0 | 0 | 0 | 0 | 0 |
| CY183 | 2 | 7 | 1 | 119.5 | 23.5 | 1 | 1 | 1 | 1 | 1 | 1 | 1 | 1 | 1 | 0 | 1 | 1 | 1 | 1 |
| CY184 | 2 | 8 | 1 | 132.5 | 36   | 1 | 1 | 0 | 0 | 0 | 1 | 1 | 1 | 0 | 0 | 0 | 1 | 0 | 1 |
| CY185 | 1 | 9 | 1 | 136.5 | 32.5 | 1 | 0 | 0 | 0 | 0 | 1 | 0 | 1 | 1 | 0 | 1 | 0 | 0 | 0 |
| CY186 | 2 | 7 | 1 | 126.5 | 25.5 | 0 | 1 | 1 | 1 | 0 | 0 | 0 | 0 | 0 | 0 | 1 | 1 | 1 | 0 |
| CY187 | 2 | 8 | 1 | 143   | 41.5 | 1 | 1 | 0 | 0 | 0 | 0 | 0 | 0 | 0 | 0 | 0 | 0 | 0 | 0 |
| CY188 | 2 | 8 | 1 | 125.5 | 20   | 1 | 1 | 0 | 1 | 0 | 1 | 1 | 1 | 1 | 1 | 1 | 1 | 1 | 1 |
| CY189 | 1 | 7 | 1 | 123.5 | 23   | 1 | 1 | 0 | 0 | 0 | 1 | 0 | 1 | 0 | 0 | 1 | 0 | 0 | 0 |
| CY190 | 1 | 6 | 1 | 119.5 | 23   | 1 | 1 | 0 | 1 | 1 | 0 | 0 | 1 | 0 | 0 | 0 | 1 | 0 | 1 |
| CY191 | 1 | 9 | 1 | 139   | 32   | 1 | 1 | 0 | 0 | 1 | 1 | 0 | 1 | 0 | 0 | 0 | 1 | 0 | 0 |
| CY192 | 2 | 7 | 1 | 120.5 | 20.5 | 1 | 1 | 0 | 0 | 0 | 0 | 0 | 0 | 0 | 0 | 0 | 0 | 0 | 0 |
| CY193 | 2 | 7 | 1 | 128.5 | 23.5 | 0 | 0 | 0 | 0 | 0 | 0 | 0 | 0 | 0 | 0 | 0 | 0 | 0 | 0 |
| KM001 | 2 | 7 | 2 | 119.5 | 22   | 1 | 1 | 0 | 0 | 0 | 1 | 1 | 1 | 0 | 0 | 1 | 0 | 1 | 1 |
| KM002 | 1 | 6 | 2 | 118   | 21   | 0 | 1 | 0 | 0 | 0 | 0 | 0 | 0 | 0 | 0 | 0 | 0 | 0 | 0 |
| KM003 | 2 | 8 | 2 | 127   | 25   | 1 | 1 | 0 | 1 | 0 | 1 | 0 | 1 | 0 | 0 | 0 | 1 | 1 | 0 |
| KM004 | 1 | 6 | 2 | 116   | 21   | 1 | 1 | 0 | 0 | 1 | 0 | 0 | 1 | 1 | 0 | 1 | 0 | 1 | 1 |
| KM005 | 2 | 8 | 2 | 133.5 | 26   | 1 | 1 | 0 | 1 | 0 | 1 | 0 | 1 | 0 | 0 | 0 | 1 | 1 | 0 |
| KM006 | 2 | 7 | 2 | 124.5 | 25   | 1 | 1 | 0 | 0 | 0 | 0 | 0 | 1 | 0 | 0 | 1 | 0 | 0 | 0 |
| KM007 | 2 | 9 | 2 | 133   | 31   | 1 | 0 | 0 | 1 | 0 | 1 | 0 | 1 | 0 | 0 | 0 | 1 | 0 | 0 |
| KM008 | 1 | 6 | 2 | 127.5 | 31   | 1 | 1 | 0 | 0 | 0 | 0 | 0 | 1 | 0 | 0 | 1 | 1 | 1 | 0 |
| KM009 | 1 | 9 | 2 | 131.5 | 29.5 | 1 | 1 | 1 | 1 | 1 | 1 | 1 | 1 | 0 | 1 | 1 | 1 | 1 | 1 |
| KM010 | 1 | 8 | 2 | 130   | 31.5 | 1 | 1 | 1 | 1 | 1 | 0 | 1 | 1 | 1 | 0 | 1 | 1 | 1 | 0 |
| KM011 | 1 | 9 | 2 | 135.5 | 31.5 | 1 | 1 | 0 | 1 | 1 | 1 | 0 | 1 | 0 | 0 | 1 | 1 | 1 | 1 |
| KM012 | 2 | 7 | 2 | 125.5 | 24.5 | 1 | 1 | 1 | 1 | 0 | 0 | 1 | 1 | 0 | 0 | 0 | 1 | 1 | 1 |

|       |   |   |   |       |      |   |   |   |   |   |   |   |   |   |   |   |   |   |   |
|-------|---|---|---|-------|------|---|---|---|---|---|---|---|---|---|---|---|---|---|---|
| KM013 | 2 | 8 | 2 | 129.5 | 32   | 1 | 1 | 0 | 1 | 0 | 1 | 1 | 1 | 0 | 0 | 0 | 1 | 1 | 0 |
| KM014 | 2 | 8 | 2 | 135.5 | 36.5 | 1 | 1 | 1 | 1 | 1 | 0 | 1 | 1 | 1 | 0 | 1 | 1 | 1 | 0 |
| KM015 | 1 | 9 | 2 | 138   | 30   | 1 | 1 | 1 | 1 | 1 | 1 | 1 | 1 | 1 | 1 | 1 | 1 | 1 | 0 |
| KM016 | 2 | 9 | 2 | 134   | 41   | 1 | 1 | 1 | 1 | 1 | 1 | 1 | 1 | 1 | 1 | 1 | 1 | 1 | 0 |
| KM017 | 1 | 9 | 2 | 132   | 34   | 1 | 1 | 0 | 0 | 1 | 1 | 0 | 1 | 0 | 0 | 0 | 1 | 0 | 0 |
| KM018 | 2 | 6 | 2 | 119.5 | 25.5 | 1 | 0 | 0 | 1 | 0 | 1 | 0 | 0 | 0 | 0 | 0 | 0 | 0 | 0 |
| KM019 | 1 | 8 | 2 | 135   | 32   | 1 | 1 | 1 | 1 | 1 | 0 | 1 | 1 | 1 | 1 | 1 | 0 | 0 | 1 |
| KM020 | 2 | 8 | 2 | 127   | 22   | 1 | 1 | 0 | 0 | 1 | 1 | 0 | 1 | 0 | 1 | 1 | 0 | 0 | 1 |
| KM021 | 2 | 8 | 2 | 130.5 | 23.5 | 1 | 0 | 0 | 0 | 0 | 0 | 0 | 0 | 0 | 0 | 1 | 1 | 1 | 0 |
| KM022 | 2 | 6 | 2 | 117.5 | 19   | 1 | 0 | 0 | 1 | 0 | 0 | 0 | 0 | 0 | 0 | 1 | 0 | 0 | 0 |
| KM023 | 1 | 9 | 2 | 133   | 25   | 1 | 1 | 1 | 0 | 1 | 1 | 0 | 0 | 0 | 0 | 1 | 1 | 1 | 0 |
| KM024 | 2 | 8 | 2 | 137   | 28.5 | 1 | 0 | 0 | 0 | 0 | 0 | 0 | 0 | 0 | 0 | 0 | 1 | 0 | 1 |
| KM025 | 1 | 7 | 2 | 128.5 | 29.5 | 1 | 1 | 0 | 1 | 0 | 1 | 0 | 1 | 0 | 0 | 1 | 1 | 1 | 1 |
| KM026 | 1 | 8 | 2 | 139   | 36.8 | 1 | 1 | 0 | 1 | 0 | 0 | 1 | 1 | 0 | 0 | 1 | 1 | 0 | 0 |
| KM027 | 1 | 6 | 2 | 117   | 21   | 1 | 1 | 0 | 1 | 0 | 1 | 0 | 0 | 0 | 0 | 1 | 1 | 1 | 0 |
| KM028 | 1 | 8 | 2 | 129   | 28   | 1 | 1 | 1 | 1 | 1 | 1 | 1 | 1 | 0 | 1 | 1 | 1 | 1 | 0 |
| KM029 | 1 | 8 | 2 | 139.5 | 37.5 | 1 | 1 | 0 | 0 | 1 | 0 | 1 | 1 | 1 | 1 | 0 | 0 | 0 | 0 |
| KM030 | 1 | 8 | 2 | 131   | 29.5 | 1 | 1 | 0 | 1 | 0 | 1 | 1 | 0 | 0 | 1 | 1 | 1 | 0 | 1 |
| KM031 | 1 | 8 | 2 | 140   | 32   | 1 | 1 | 0 | 1 | 0 | 0 | 1 | 0 | 0 | 0 | 1 | 0 | 1 | 1 |
| KM032 | 2 | 7 | 2 | 125.5 | 21.5 | 1 | 1 | 1 | 1 | 1 | 1 | 0 | 1 | 0 | 0 | 0 | 1 | 0 | 1 |
| KM033 | 2 | 6 | 2 | 119.5 | 23.5 | 1 | 1 | 0 | 1 | 1 | 1 | 1 | 1 | 1 | 0 | 1 | 1 | 1 | 1 |
| KM034 | 1 | 8 | 2 | 127.5 | 23   | 1 | 0 | 0 | 0 | 0 | 0 | 0 | 0 | 0 | 0 | 0 | 0 | 0 | 0 |
| KM035 | 1 | 8 | 2 | 127   | 25.5 | 1 | 1 | 0 | 1 | 1 | 1 | 1 | 1 | 1 | 0 | 1 | 1 | 1 | 1 |
| KM036 | 2 | 6 | 2 | 115.5 | 18   | 1 | 1 | 0 | 0 | 1 | 0 | 0 | 0 | 0 | 0 | 1 | 0 | 1 | 1 |
| KM037 | 2 | 6 | 2 | 128   | 33   | 1 | 1 | 0 | 1 | 1 | 0 | 1 | 1 | 0 | 1 | 1 | 1 | 1 | 1 |
| KM038 | 1 | 7 | 2 | 127.5 | 31.5 | 1 | 1 | 0 | 1 | 1 | 0 | 1 | 0 | 0 | 0 | 1 | 0 | 0 | 0 |
| KM039 | 2 | 6 | 2 | 114   | 19   | 0 | 0 | 0 | 0 | 0 | 0 | 0 | 0 | 0 | 0 | 0 | 0 | 0 | 0 |
| KM040 | 2 | 7 | 2 | 125.5 | 22   | 1 | 1 | 0 | 0 | 1 | 1 | 1 | 1 | 0 | 0 | 1 | 1 | 1 | 0 |
| KM041 | 2 | 8 | 2 | 127   | 22   | 0 | 1 | 0 | 0 | 1 | 0 | 1 | 0 | 0 | 0 | 0 | 1 | 1 | 0 |
| KM042 | 1 | 6 | 2 | 120.5 | 22   | 1 | 1 | 0 | 0 | 0 | 0 | 0 | 0 | 0 | 0 | 0 | 0 | 0 | 0 |
| KM043 | 2 | 7 | 2 | 125.5 | 24   | 0 | 1 | 0 | 0 | 0 | 1 | 1 | 1 | 0 | 0 | 0 | 1 | 1 | 1 |
| KM044 | 2 | 8 | 2 | 136   | 30   | 1 | 1 | 0 | 0 | 1 | 1 | 1 | 0 | 0 | 0 | 0 | 0 | 0 | 0 |
| KM045 | 2 | 8 | 2 | 132.5 | 26.5 | 0 | 0 | 0 | 0 | 0 | 0 | 0 | 0 | 0 | 0 | 0 | 0 | 1 | 0 |
| KM046 | 1 | 7 | 2 | 123.5 | 21.5 | 1 | 1 | 0 | 1 | 0 | 1 | 0 | 1 | 0 | 1 | 1 | 1 | 0 | 1 |
| KM047 | 2 | 6 | 2 | 115.5 | 20   | 1 | 0 | 0 | 1 | 1 | 0 | 0 | 0 | 0 | 0 | 1 | 0 | 0 | 0 |
| KM048 | 2 | 8 | 2 | 127   | 22   | 1 | 1 | 0 | 0 | 1 | 1 | 0 | 1 | 0 | 0 | 1 | 0 | 0 | 1 |
| KM049 | 2 | 8 | 2 | 123   | 23.5 | 1 | 1 | 0 | 1 | 1 | 0 | 0 | 0 | 0 | 0 | 1 | 1 | 1 | 0 |
| KM050 | 1 | 6 | 2 | 121   | 23.5 | 1 | 1 | 0 | 1 | 0 | 1 | 0 | 1 | 0 | 0 | 1 | 1 | 1 | 0 |
| KM051 | 2 | 9 | 2 | 136.5 | 32   | 1 | 1 | 0 | 0 | 1 | 1 | 0 | 0 | 0 | 0 | 0 | 1 | 0 | 0 |
| KM052 | 2 | 6 | 2 | 119.5 | 20.5 | 0 | 1 | 0 | 0 | 0 | 0 | 0 | 0 | 0 | 0 | 0 | 0 | 0 | 0 |
| KM053 | 2 | 8 | 2 | 133   | 22   | 1 | 1 | 0 | 1 | 1 | 1 | 1 | 1 | 0 | 0 | 1 | 1 | 1 | 1 |
| KM054 | 2 | 9 | 2 | 146   | 28   | 1 | 1 | 1 | 1 | 1 | 1 | 0 | 1 | 1 | 0 | 1 | 0 | 1 | 1 |
| KM055 | 2 | 6 | 2 | 122   | 22   | 1 | 1 | 0 | 1 | 1 | 1 | 1 | 0 | 0 | 0 | 1 | 1 | 1 | 0 |
| KM056 | 2 | 6 | 2 | 112   | 18   | 1 | 1 | 0 | 0 | 0 | 1 | 0 | 0 | 0 | 0 | 0 | 1 | 0 | 0 |
| KM057 | 2 | 9 | 2 | 126   | 26   | 1 | 1 | 1 | 1 | 1 | 1 | 1 | 1 | 0 | 1 | 0 | 1 | 1 | 1 |
| KM058 | 1 | 6 | 2 | 121   | 24.5 | 1 | 1 | 0 | 0 | 0 | 0 | 0 | 1 | 0 | 0 | 1 | 1 | 0 | 0 |
| KM059 | 1 | 6 | 2 | 120.5 | 27   | 1 | 1 | 0 | 1 | 0 | 1 | 1 | 1 | 1 | 1 | 1 | 1 | 1 | 0 |
| KM060 | 2 | 7 | 2 | 128.5 | 24.5 | 1 | 1 | 0 | 1 | 1 | 1 | 1 | 1 | 1 | 1 | 0 | 1 | 1 | 0 |
| KM061 | 1 | 8 | 2 | 125.5 | 22   | 0 | 1 | 0 | 0 | 1 | 0 | 1 | 0 | 0 | 0 | 0 | 1 | 1 | 0 |
| KM062 | 2 | 6 | 2 | 117   | 18   | 1 | 1 | 0 | 1 | 0 | 0 | 1 | 0 | 0 | 0 | 0 | 0 | 0 | 0 |
| KM063 | 1 | 6 | 2 | 117   | 23   | 1 | 1 | 0 | 1 | 0 | 1 | 0 | 1 | 0 | 0 | 0 | 1 | 1 | 0 |
| KM064 | 1 | 7 | 2 | 122   | 24.5 | 1 | 1 | 1 | 1 | 0 | 1 | 1 | 1 | 1 | 0 | 1 | 1 | 1 | 1 |
| KM065 | 1 | 6 | 2 | 121.5 | 20.5 | 0 | 0 | 0 | 0 | 1 | 1 | 0 | 0 | 0 | 0 | 1 | 0 | 1 | 0 |
| KM066 | 1 | 6 | 2 | 123   | 25   | 0 | 0 | 0 | 0 | 0 | 0 | 0 | 0 | 0 | 0 | 0 | 0 | 0 | 0 |
| KM067 | 1 | 9 | 2 | 140   | 37.5 | 1 | 1 | 1 | 1 | 1 | 1 | 1 | 1 | 1 | 1 | 1 | 1 | 1 | 1 |
| KM068 | 1 | 8 | 2 | 132   | 28.5 | 1 | 1 | 1 | 1 | 1 | 1 | 1 | 1 | 1 | 1 | 1 | 1 | 1 | 0 |
| KM069 | 1 | 7 | 2 | 128.5 | 39   | 1 | 1 | 0 | 0 | 0 | 0 | 0 | 1 | 1 | 0 | 0 | 1 | 0 | 1 |
| KM070 | 1 | 8 | 2 | 130.5 | 30   | 1 | 1 | 0 | 1 | 0 | 1 | 1 | 1 | 1 | 1 | 1 | 1 | 1 | 0 |
| KM071 | 1 | 9 | 2 | 133   | 23.5 | 1 | 1 | 1 | 0 | 1 | 1 | 1 | 1 | 1 | 1 | 1 | 1 | 1 | 1 |
| KM072 | 2 | 9 | 2 | 135   | 32.5 | 1 | 1 | 1 | 1 | 1 | 1 | 1 | 1 | 0 | 0 | 1 | 1 | 0 | 0 |
| KM073 | 2 | 6 | 2 | 112   | 17.5 | 1 | 1 | 0 | 1 | 1 | 1 | 1 | 1 | 1 | 1 | 1 | 1 | 1 | 0 |
| KM074 | 1 | 8 | 2 | 128   | 28   | 1 | 0 | 0 | 1 | 0 | 1 | 0 | 0 | 0 | 0 | 0 | 0 | 0 | 0 |
| KM075 | 2 | 7 | 2 | 123.5 | 24   | 1 | 0 | 0 | 0 | 0 | 0 | 0 | 0 | 0 | 0 | 0 | 0 | 0 | 0 |
| KM076 | 2 | 6 | 2 | 118.5 | 26   | 1 | 1 | 0 | 0 | 1 | 0 | 0 | 1 | 1 | 1 | 1 | 1 | 1 | 0 |
| KM077 | 2 | 6 | 2 | 122   | 28   | 1 | 1 | 0 | 0 | 0 | 0 | 0 | 0 | 0 | 0 | 0 | 0 | 0 | 0 |
| KM078 | 2 | 6 | 2 | 117   | 21   | 1 | 1 | 0 | 0 | 0 | 1 | 0 | 0 | 1 | 1 | 1 | 1 | 1 | 1 |
| KM079 | 1 | 7 | 2 | 127.5 | 29   | 0 | 1 | 0 | 0 | 0 | 0 | 0 | 0 | 0 | 0 | 0 | 0 | 0 | 0 |
| KM080 | 1 | 7 | 2 | 132.5 | 26   | 1 | 1 | 0 | 0 | 0 | 1 | 0 | 0 | 0 | 0 | 1 | 0 | 0 | 0 |
| KM081 | 2 | 6 | 2 | 124   | 24.5 | 1 | 1 | 1 | 1 | 0 | 1 | 1 | 1 | 1 | 1 | 1 | 1 | 1 | 0 |

|       |   |   |   |       |      |   |   |   |   |   |   |   |   |   |   |   |   |   |
|-------|---|---|---|-------|------|---|---|---|---|---|---|---|---|---|---|---|---|---|
| KM082 | 2 | 6 | 2 | 109.5 | 17   | 1 | 1 | 0 | 1 | 0 | 1 | 1 | 1 | 1 | 1 | 1 | 1 | 1 |
| KM083 | 2 | 6 | 2 | 118   | 24.5 | 0 | 1 | 0 | 0 | 0 | 1 | 0 | 0 | 0 | 0 | 1 | 0 | 0 |
| KM084 | 2 | 6 | 2 | 118   | 23   | 1 | 1 | 1 | 1 | 0 | 1 | 0 | 1 | 1 | 0 | 1 | 1 | 1 |
| KM085 | 2 | 9 | 2 | 134   | 29.5 | 1 | 1 | 0 | 1 | 1 | 1 | 1 | 1 | 0 | 0 | 1 | 1 | 0 |
| KM086 | 1 | 8 | 2 | 129   | 30.5 | 1 | 1 | 0 | 0 | 1 | 1 | 0 | 0 | 0 | 0 | 0 | 1 | 0 |
| KM087 | 1 | 9 | 2 | 138   | 35   | 1 | 1 | 0 | 1 | 0 | 1 | 0 | 1 | 0 | 0 | 0 | 1 | 0 |
| KM088 | 2 | 6 | 2 | 119.5 | 23   | 1 | 0 | 0 | 0 | 0 | 0 | 0 | 0 | 0 | 0 | 0 | 0 | 0 |
| KM089 | 1 | 7 | 2 | 125.5 | 23.5 | 0 | 0 | 0 | 0 | 0 | 0 | 0 | 0 | 0 | 0 | 0 | 0 | 0 |
| KM090 | 2 | 6 | 2 | 113   | 18   | 1 | 0 | 0 | 0 | 0 | 0 | 0 | 0 | 0 | 0 | 0 | 0 | 0 |
| KM091 | 2 | 8 | 2 | 128.5 | 26   | 1 | 0 | 0 | 1 | 0 | 1 | 0 | 0 | 0 | 0 | 0 | 0 | 0 |
| KM092 | 1 | 9 | 2 | 135.5 | 31.5 | 1 | 1 | 0 | 1 | 1 | 1 | 1 | 1 | 0 | 1 | 1 | 1 | 1 |
| KM093 | 2 | 9 | 2 | 128.5 | 28.5 | 1 | 1 | 1 | 1 | 0 | 1 | 1 | 1 | 1 | 1 | 1 | 0 | 1 |
| KM094 | 1 | 9 | 2 | 133   | 30.5 | 1 | 1 | 0 | 1 | 1 | 1 | 1 | 1 | 0 | 0 | 1 | 1 | 1 |
| KM095 | 2 | 7 | 2 | 124.5 | 21.5 | 0 | 0 | 0 | 0 | 1 | 1 | 0 | 1 | 0 | 0 | 1 | 0 | 1 |
| KM096 | 1 | 9 | 2 | 141.5 | 32   | 1 | 1 | 0 | 1 | 0 | 0 | 1 | 1 | 0 | 0 | 1 | 0 | 1 |
| KM097 | 2 | 9 | 2 | 136   | 37   | 1 | 1 | 1 | 1 | 1 | 1 | 1 | 1 | 0 | 1 | 1 | 1 | 1 |
| KM098 | 1 | 8 | 2 | 127   | 22   | 1 | 1 | 0 | 1 | 1 | 0 | 1 | 0 | 0 | 0 | 1 | 0 | 0 |
| KM099 | 1 | 9 | 2 | 133   | 32   | 1 | 1 | 1 | 1 | 1 | 1 | 1 | 1 | 1 | 1 | 1 | 1 | 1 |
| KM100 | 2 | 9 | 2 | 138   | 35.5 | 1 | 1 | 0 | 1 | 1 | 0 | 1 | 1 | 0 | 1 | 1 | 1 | 0 |
| KM101 | 1 | 8 | 2 | 127   | 27   | 1 | 1 | 1 | 1 | 0 | 1 | 0 | 0 | 1 | 0 | 1 | 1 | 1 |
| KM102 | 2 | 7 | 2 | 124.5 | 34.5 | 1 | 1 | 0 | 0 | 0 | 0 | 0 | 0 | 1 | 1 | 1 | 1 | 0 |
| KM103 | 2 | 8 | 2 | 130   | 28.5 | 1 | 1 | 0 | 0 | 1 | 0 | 0 | 1 | 0 | 0 | 1 | 1 | 1 |
| KM104 | 2 | 7 | 2 | 125.5 | 24.5 | 1 | 1 | 1 | 1 | 1 | 1 | 1 | 1 | 1 | 1 | 1 | 1 | 0 |
| KM105 | 2 | 7 | 2 | 129.5 | 27   | 1 | 1 | 0 | 0 | 0 | 0 | 0 | 0 | 0 | 0 | 0 | 0 | 0 |
| KM106 | 1 | 7 | 2 | 127.5 | 24.5 | 1 | 0 | 0 | 1 | 0 | 1 | 0 | 1 | 0 | 0 | 1 | 1 | 1 |
| KM107 | 1 | 7 | 2 | 128.5 | 26   | 0 | 1 | 0 | 0 | 1 | 0 | 1 | 0 | 0 | 0 | 1 | 1 | 1 |
| KM108 | 2 | 8 | 2 | 133   | 24   | 1 | 1 | 0 | 0 | 1 | 1 | 0 | 0 | 1 | 0 | 0 | 0 | 1 |
| KM109 | 2 | 8 | 2 | 127.5 | 28   | 1 | 1 | 0 | 0 | 0 | 1 | 0 | 0 | 0 | 0 | 1 | 1 | 0 |
| KM110 | 1 | 8 | 2 | 127.5 | 26   | 1 | 1 | 1 | 1 | 1 | 1 | 0 | 1 | 1 | 0 | 1 | 1 | 1 |
| KM111 | 1 | 9 | 2 | 135.5 | 29   | 1 | 1 | 1 | 1 | 1 | 1 | 1 | 1 | 1 | 1 | 1 | 1 | 1 |
| KM112 | 1 | 9 | 2 | 134.5 | 35   | 1 | 1 | 0 | 1 | 1 | 1 | 1 | 1 | 0 | 1 | 1 | 1 | 1 |
| KM113 | 2 | 6 | 2 | 120   | 32   | 0 | 0 | 0 | 0 | 0 | 0 | 0 | 0 | 0 | 0 | 0 | 0 | 0 |
| KM114 | 1 | 7 | 2 | 123.5 | 23.5 | 1 | 1 | 0 | 1 | 1 | 0 | 0 | 1 | 0 | 0 | 1 | 1 | 0 |
| KM115 | 2 | 6 | 2 | 111.5 | 19   | 1 | 1 | 0 | 1 | 1 | 1 | 1 | 0 | 0 | 0 | 1 | 1 | 0 |
| KM116 | 1 | 7 | 2 | 125.5 | 24   | 0 | 0 | 0 | 0 | 0 | 0 | 0 | 0 | 0 | 0 | 0 | 0 | 0 |
| KM117 | 2 | 6 | 2 | 118   | 22   | 1 | 1 | 0 | 0 | 0 | 0 | 0 | 0 | 0 | 0 | 0 | 0 | 0 |
| KM118 | 2 | 7 | 2 | 116.5 | 19   | 1 | 1 | 1 | 1 | 0 | 1 | 1 | 1 | 1 | 0 | 1 | 1 | 1 |
| KM119 | 2 | 7 | 2 | 126.5 | 35.5 | 1 | 1 | 1 | 0 | 0 | 1 | 1 | 0 | 0 | 0 | 0 | 0 | 1 |
| KM120 | 1 | 8 | 2 | 128   | 26.5 | 1 | 1 | 1 | 1 | 1 | 1 | 1 | 1 | 1 | 1 | 1 | 1 | 0 |
| KM121 | 1 | 7 | 2 | 123   | 27   | 1 | 1 | 0 | 0 | 1 | 1 | 0 | 0 | 1 | 0 | 1 | 1 | 1 |
| KM122 | 1 | 6 | 2 | 121.5 | 24   | 1 | 1 | 0 | 0 | 0 | 0 | 0 | 0 | 0 | 0 | 1 | 0 | 0 |
| KM123 | 2 | 9 | 2 | 134   | 28   | 1 | 0 | 0 | 0 | 0 | 0 | 1 | 0 | 0 | 0 | 1 | 0 | 0 |
| KM124 | 2 | 6 | 2 | 122   | 20.5 | 1 | 1 | 0 | 0 | 0 | 1 | 1 | 1 | 0 | 0 | 1 | 1 | 0 |
| KM125 | 2 | 9 | 2 | 139.5 | 33   | 1 | 1 | 0 | 0 | 0 | 1 | 0 | 1 | 0 | 0 | 1 | 1 | 1 |
| KM126 | 1 | 6 | 2 | 121.5 | 25   | 1 | 1 | 0 | 1 | 0 | 1 | 0 | 0 | 1 | 0 | 0 | 1 | 1 |
| KM127 | 1 | 6 | 2 | 125.5 | 22   | 1 | 1 | 0 | 0 | 0 | 0 | 0 | 0 | 1 | 0 | 0 | 1 | 0 |
| KM128 | 1 | 6 | 2 | 117   | 22   | 1 | 1 | 1 | 1 | 1 | 1 | 1 | 1 | 0 | 1 | 1 | 1 | 1 |
| KM129 | 1 | 8 | 2 | 135   | 25.5 | 1 | 1 | 1 | 1 | 1 | 1 | 1 | 1 | 1 | 1 | 1 | 1 | 1 |
| KM130 | 2 | 6 | 2 | 120   | 19   | 0 | 0 | 0 | 0 | 0 | 0 | 0 | 0 | 0 | 0 | 0 | 0 | 0 |
| KM131 | 2 | 8 | 2 | 130   | 31   | 1 | 1 | 0 | 0 | 1 | 0 | 1 | 1 | 1 | 0 | 0 | 0 | 0 |
| KM132 | 2 | 8 | 2 | 137.5 | 30   | 1 | 0 | 0 | 1 | 1 | 0 | 0 | 0 | 0 | 0 | 0 | 0 | 0 |
| KM133 | 1 | 8 | 2 | 129   | 25.5 | 1 | 1 | 1 | 1 | 1 | 1 | 1 | 1 | 1 | 1 | 1 | 1 | 1 |
| KM134 | 1 | 6 | 2 | 126.5 | 27   | 1 | 1 | 0 | 0 | 0 | 1 | 0 | 0 | 0 | 0 | 1 | 1 | 1 |
| KM135 | 2 | 6 | 2 | 117   | 21   | 1 | 1 | 0 | 0 | 1 | 1 | 0 | 0 | 0 | 1 | 0 | 1 | 0 |
| KM136 | 2 | 7 | 2 | 126.5 | 25.5 | 1 | 1 | 0 | 1 | 1 | 1 | 1 | 0 | 1 | 0 | 1 | 1 | 1 |
| KM137 | 1 | 8 | 2 | 135.5 | 31.5 | 1 | 1 | 0 | 1 | 1 | 0 | 0 | 1 | 0 | 0 | 0 | 1 | 0 |
| KM138 | 1 | 6 | 2 | 120.5 | 23.5 | 1 | 1 | 0 | 0 | 0 | 1 | 1 | 1 | 0 | 0 | 1 | 1 | 0 |
| KM139 | 1 | 8 | 2 | 132.5 | 30.5 | 1 | 1 | 0 | 0 | 1 | 1 | 1 | 0 | 0 | 0 | 1 | 1 | 0 |
| KM140 | 2 | 7 | 2 | 125   | 25   | 1 | 0 | 0 | 0 | 0 | 1 | 0 | 1 | 1 | 1 | 1 | 0 | 0 |
| KM141 | 1 | 9 | 2 | 140.5 | 37   | 1 | 1 | 0 | 1 | 1 | 0 | 0 | 0 | 0 | 0 | 1 | 1 | 1 |
| KM142 | 2 | 9 | 2 | 132.5 | 23   | 1 | 1 | 0 | 1 | 1 | 1 | 1 | 1 | 1 | 1 | 1 | 1 | 0 |
| KM143 | 2 | 6 | 2 | 127   | 23.5 | 1 | 0 | 0 | 1 | 0 | 1 | 0 | 0 | 0 | 0 | 0 | 0 | 0 |
| KM144 | 2 | 6 | 2 | 120   | 19   | 1 | 1 | 1 | 0 | 0 | 1 | 1 | 0 | 0 | 0 | 0 | 0 | 1 |
| KM145 | 2 | 7 | 2 | 125   | 25   | 1 | 1 | 0 | 1 | 1 | 0 | 1 | 0 | 0 | 0 | 1 | 0 | 0 |
| KM146 | 1 | 8 | 2 | 133   | 35.5 | 1 | 1 | 0 | 0 | 0 | 0 | 0 | 1 | 0 | 0 | 1 | 1 | 0 |
| KM147 | 1 | 9 | 2 | 139   | 45   | 1 | 1 | 0 | 1 | 1 | 1 | 0 | 1 | 0 | 0 | 0 | 1 | 0 |
| KM148 | 1 | 6 | 2 | 121.5 | 21.5 | 1 | 1 | 0 | 0 | 0 | 1 | 1 | 1 | 0 | 0 | 1 | 1 | 0 |
| KM149 | 1 | 7 | 2 | 131.5 | 30.5 | 1 | 1 | 0 | 0 | 1 | 1 | 1 | 0 | 0 | 0 | 0 | 0 | 0 |
| KM150 | 2 | 8 | 2 | 127   | 27.5 | 1 | 1 | 0 | 1 | 1 | 1 | 1 | 1 | 1 | 1 | 1 | 1 | 1 |

|       |   |   |   |       |      |   |   |   |   |   |   |   |   |   |   |   |   |   |   |
|-------|---|---|---|-------|------|---|---|---|---|---|---|---|---|---|---|---|---|---|---|
| KM151 | 1 | 7 | 2 | 126.5 | 27.5 | 1 | 1 | 0 | 1 | 1 | 0 | 1 | 0 | 0 | 0 | 1 | 0 | 0 | 0 |
| KM152 | 1 | 7 | 2 | 126   | 27.5 | 1 | 1 | 0 | 1 | 1 | 1 | 1 | 1 | 1 | 1 | 1 | 1 | 1 | 0 |
| KM153 | 2 | 7 | 2 | 123.5 | 23   | 1 | 1 | 0 | 1 | 0 | 1 | 1 | 1 | 1 | 0 | 1 | 1 | 1 | 1 |
| KM154 | 2 | 9 | 2 | 147.5 | 38.5 | 1 | 1 | 0 | 1 | 1 | 1 | 0 | 0 | 0 | 0 | 1 | 1 | 1 | 1 |
| KM155 | 1 | 7 | 2 | 118.5 | 22.5 | 1 | 1 | 0 | 0 | 1 | 1 | 0 | 1 | 0 | 0 | 1 | 1 | 1 | 0 |
| KM156 | 1 | 7 | 2 | 130.5 | 31   | 1 | 1 | 0 | 0 | 0 | 0 | 0 | 1 | 1 | 0 | 0 | 1 | 0 | 1 |
| KM157 | 2 | 6 | 2 | 113   | 17   | 1 | 0 | 0 | 0 | 0 | 0 | 0 | 0 | 0 | 0 | 0 | 0 | 0 | 0 |
| KM158 | 1 | 8 | 2 | 128.5 | 24.5 | 0 | 1 | 0 | 0 | 0 | 0 | 0 | 0 | 0 | 0 | 0 | 0 | 0 | 0 |
| KM159 | 1 | 6 | 2 | 117   | 24   | 0 | 0 | 0 | 0 | 0 | 0 | 0 | 0 | 0 | 0 | 0 | 0 | 1 | 0 |
| KM160 | 2 | 6 | 2 | 120   | 25   | 0 | 0 | 0 | 0 | 0 | 0 | 0 | 0 | 0 | 0 | 0 | 0 | 0 | 0 |
| KM161 | 2 | 9 | 2 | 140   | 40   | 1 | 1 | 0 | 1 | 0 | 1 | 0 | 0 | 0 | 0 | 1 | 1 | 1 | 0 |
| KM162 | 2 | 6 | 2 | 113   | 21   | 0 | 0 | 0 | 0 | 0 | 0 | 0 | 0 | 0 | 0 | 0 | 0 | 0 | 0 |
| KM163 | 2 | 9 | 2 | 129.5 | 28.5 | 1 | 1 | 0 | 1 | 1 | 0 | 0 | 1 | 0 | 0 | 1 | 1 | 0 | 0 |
| KM164 | 1 | 9 | 2 | 138   | 32   | 1 | 1 | 0 | 0 | 0 | 0 | 0 | 0 | 1 | 0 | 1 | 1 | 0 | 0 |
| KM165 | 1 | 9 | 2 | 137.5 | 31   | 1 | 1 | 1 | 1 | 1 | 1 | 1 | 1 | 1 | 1 | 1 | 1 | 1 | 0 |
| KM166 | 1 | 8 | 2 | 133.5 | 30   | 1 | 1 | 0 | 1 | 1 | 1 | 0 | 1 | 0 | 0 | 1 | 0 | 0 | 0 |
| KM167 | 2 | 6 | 2 | 121   | 23.5 | 1 | 1 | 0 | 0 | 0 | 0 | 0 | 0 | 0 | 0 | 1 | 0 | 0 | 0 |
| KM168 | 1 | 7 | 2 | 128.5 | 26   | 1 | 1 | 0 | 0 | 1 | 1 | 0 | 1 | 0 | 0 | 1 | 1 | 0 | 1 |
| KM169 | 1 | 7 | 2 | 131.5 | 30.5 | 1 | 1 | 0 | 0 | 0 | 0 | 0 | 0 | 0 | 0 | 1 | 0 | 0 | 0 |
| KM170 | 1 | 7 | 2 | 130.5 | 26.5 | 1 | 1 | 1 | 0 | 0 | 0 | 1 | 0 | 0 | 0 | 1 | 1 | 1 | 1 |
| KM171 | 2 | 6 | 2 | 120   | 19.5 | 1 | 1 | 0 | 1 | 0 | 1 | 0 | 1 | 1 | 1 | 1 | 1 | 1 | 1 |
| SN001 | 1 | 9 | 3 | 139   | 38   | 1 | 1 | 0 | 1 | 1 | 1 | 0 | 1 | 0 | 0 | 1 | 1 | 1 | 1 |
| SN002 | 2 | 7 | 3 | 121.5 | 21   | 1 | 1 | 0 | 1 | 1 | 1 | 1 | 1 | 0 | 0 | 1 | 1 | 1 | 1 |
| SN003 | 2 | 8 | 3 | 133   | 27.5 | 1 | 1 | 0 | 1 | 1 | 1 | 0 | 1 | 0 | 0 | 1 | 1 | 1 | 0 |
| SN004 | 1 | 9 | 3 | 141.5 | 40   | 1 | 1 | 0 | 1 | 1 | 1 | 0 | 1 | 0 | 1 | 1 | 1 | 1 | 0 |
| SN005 | 2 | 8 | 3 | 128   | 20   | 1 | 1 | 0 | 1 | 0 | 0 | 1 | 0 | 0 | 0 | 1 | 1 | 0 | 0 |
| SN006 | 1 | 8 | 3 | 132   | 31   | 1 | 1 | 0 | 1 | 1 | 0 | 1 | 1 | 0 | 0 | 1 | 1 | 0 | 0 |
| SN007 | 2 | 8 | 3 | 131   | 27   | 1 | 1 | 0 | 0 | 1 | 0 | 0 | 0 | 0 | 0 | 1 | 0 | 1 | 1 |
| SN008 | 2 | 8 | 3 | 131   | 28.5 | 1 | 1 | 0 | 1 | 1 | 1 | 0 | 1 | 0 | 1 | 1 | 1 | 0 | 0 |
| SN009 | 2 | 6 | 3 | 115.5 | 19.5 | 1 | 1 | 0 | 1 | 1 | 1 | 0 | 0 | 0 | 1 | 1 | 1 | 1 | 0 |
| SN010 | 1 | 9 | 3 | 128.5 | 31   | 1 | 1 | 0 | 1 | 0 | 1 | 1 | 1 | 0 | 0 | 1 | 1 | 0 | 1 |
| SN011 | 1 | 8 | 3 | 139.5 | 41   | 1 | 1 | 0 | 1 | 0 | 1 | 0 | 1 | 0 | 0 | 1 | 1 | 1 | 1 |
| SN012 | 1 | 8 | 3 | 133.5 | 31   | 1 | 1 | 0 | 1 | 1 | 1 | 0 | 1 | 0 | 0 | 1 | 1 | 1 | 0 |
| SN013 | 1 | 6 | 3 | 122.5 | 25.5 | 1 | 1 | 0 | 1 | 1 | 1 | 0 | 0 | 0 | 0 | 1 | 1 | 1 | 0 |
| SN014 | 1 | 6 | 3 | 113.5 | 21   | 1 | 1 | 0 | 1 | 1 | 1 | 1 | 0 | 0 | 1 | 1 | 0 | 0 | 0 |
| SN015 | 2 | 7 | 3 | 123.5 | 23   | 1 | 1 | 0 | 1 | 1 | 1 | 0 | 1 | 0 | 0 | 1 | 0 | 1 | 0 |
| SN016 | 1 | 9 | 3 | 136.5 | 37   | 1 | 1 | 0 | 1 | 1 | 0 | 0 | 0 | 0 | 0 | 1 | 1 | 1 | 0 |
| SN017 | 2 | 6 | 3 | 114.5 | 18   | 1 | 1 | 0 | 1 | 1 | 0 | 0 | 1 | 0 | 0 | 1 | 1 | 0 | 1 |
| SN018 | 1 | 9 | 3 | 144.5 | 39   | 1 | 1 | 0 | 1 | 1 | 0 | 1 | 1 | 0 | 1 | 1 | 1 | 0 | 0 |
| SN019 | 2 | 8 | 3 | 136.5 | 31   | 1 | 1 | 0 | 1 | 1 | 1 | 1 | 0 | 0 | 0 | 1 | 1 | 0 | 0 |
| SN020 | 1 | 8 | 3 | 129   | 31   | 1 | 1 | 0 | 1 | 1 | 1 | 1 | 1 | 0 | 0 | 1 | 0 | 0 | 0 |
| SN021 | 2 | 7 | 3 | 123.5 | 22.5 | 1 | 1 | 0 | 1 | 1 | 1 | 1 | 1 | 1 | 0 | 1 | 1 | 1 | 0 |
| SN022 | 2 | 7 | 3 | 123.5 | 24   | 1 | 1 | 0 | 1 | 1 | 0 | 1 | 1 | 0 | 0 | 1 | 1 | 1 | 1 |
| SN023 | 1 | 6 | 3 | 120   | 22   | 1 | 1 | 0 | 1 | 0 | 1 | 1 | 1 | 0 | 1 | 1 | 1 | 0 | 0 |
| SN024 | 2 | 6 | 3 | 112   | 17   | 1 | 1 | 0 | 1 | 0 | 1 | 1 | 1 | 0 | 0 | 1 | 1 | 1 | 0 |
| SN025 | 2 | 6 | 3 | 115   | 17   | 1 | 1 | 0 | 1 | 1 | 1 | 0 | 1 | 0 | 1 | 1 | 1 | 1 | 1 |
| SN026 | 2 | 8 | 3 | 130   | 33   | 1 | 1 | 0 | 1 | 1 | 1 | 1 | 0 | 0 | 0 | 1 | 1 | 0 | 1 |
| SN027 | 2 | 8 | 3 | 130.5 | 33   | 1 | 1 | 0 | 1 | 1 | 1 | 0 | 1 | 0 | 0 | 1 | 1 | 0 | 0 |
| SN028 | 1 | 7 | 3 | 125   | 26.5 | 1 | 1 | 0 | 1 | 1 | 1 | 1 | 1 | 0 | 0 | 1 | 1 | 1 | 1 |
| SN029 | 2 | 8 | 3 | 127   | 27.5 | 1 | 1 | 0 | 1 | 1 | 0 | 1 | 1 | 0 | 0 | 1 | 1 | 0 | 0 |
| SN030 | 2 | 6 | 3 | 114   | 17.5 | 1 | 1 | 0 | 1 | 0 | 0 | 1 | 1 | 0 | 0 | 1 | 1 | 0 | 1 |
| SN031 | 1 | 6 | 3 | 116   | 18   | 1 | 1 | 0 | 1 | 0 | 1 | 1 | 1 | 1 | 1 | 1 | 1 | 1 | 0 |
| SN032 | 2 | 7 | 3 | 120.5 | 16.5 | 1 | 1 | 0 | 1 | 1 | 1 | 1 | 1 | 0 | 0 | 1 | 1 | 0 | 0 |
| SN033 | 2 | 8 | 3 | 127.5 | 26.5 | 1 | 1 | 0 | 1 | 1 | 0 | 1 | 0 | 1 | 0 | 1 | 1 | 1 | 1 |
| SN034 | 1 | 7 | 3 | 121.5 | 21.5 | 1 | 1 | 0 | 1 | 1 | 1 | 0 | 0 | 0 | 0 | 1 | 1 | 1 | 1 |
| SN035 | 2 | 6 | 3 | 112.5 | 17.5 | 1 | 1 | 0 | 1 | 1 | 1 | 0 | 1 | 0 | 0 | 1 | 1 | 0 | 0 |
| SN036 | 1 | 7 | 3 | 120.5 | 22.5 | 1 | 1 | 0 | 1 | 1 | 1 | 1 | 1 | 0 | 0 | 1 | 1 | 0 | 0 |
| SN037 | 1 | 6 | 3 | 117.5 | 26   | 1 | 1 | 0 | 1 | 1 | 1 | 1 | 0 | 0 | 1 | 1 | 1 | 1 | 1 |
| SN038 | 1 | 8 | 3 | 125.5 | 24   | 1 | 1 | 0 | 1 | 1 | 1 | 1 | 1 | 0 | 0 | 1 | 1 | 1 | 0 |
| SN039 | 2 | 6 | 3 | 112.5 | 18.5 | 1 | 1 | 0 | 1 | 1 | 1 | 1 | 1 | 0 | 0 | 1 | 1 | 0 | 0 |
| SN040 | 1 | 9 | 3 | 144.5 | 37   | 1 | 1 | 0 | 1 | 1 | 1 | 0 | 1 | 0 | 1 | 1 | 1 | 1 | 0 |
| SN041 | 1 | 6 | 3 | 112.5 | 18.5 | 1 | 1 | 0 | 1 | 0 | 1 | 0 | 1 | 0 | 1 | 1 | 1 | 0 | 0 |
| SN042 | 2 | 9 | 3 | 138   | 32   | 1 | 1 | 1 | 1 | 1 | 1 | 1 | 1 | 0 | 0 | 1 | 1 | 0 | 0 |
| SN043 | 1 | 9 | 3 | 144   | 36.5 | 1 | 1 | 0 | 1 | 1 | 1 | 1 | 1 | 0 | 0 | 1 | 1 | 1 | 0 |
| SN044 | 2 | 8 | 3 | 130   | 27.5 | 1 | 1 | 0 | 1 | 0 | 1 | 1 | 0 | 0 | 1 | 1 | 1 | 0 | 0 |
| SN045 | 2 | 6 | 3 | 120.5 | 18   | 1 | 1 | 0 | 1 | 1 | 0 | 1 | 1 | 0 | 1 | 1 | 1 | 1 | 0 |
| SN046 | 1 | 6 | 3 | 115.5 | 24   | 1 | 1 | 0 | 1 | 1 | 0 | 1 | 1 | 0 | 0 | 1 | 1 | 1 | 0 |
| SN047 | 1 | 9 | 3 | 141.5 | 26.5 | 1 | 1 | 0 | 1 | 1 | 1 | 0 | 1 | 0 | 1 | 1 | 1 | 1 | 0 |
| SN048 | 1 | 8 | 3 | 123.5 | 24.5 | 1 | 1 | 0 | 1 | 1 | 1 | 0 | 1 | 0 | 1 | 0 | 1 | 0 | 0 |

|       |   |   |   |       |      |   |   |   |   |   |   |   |   |   |   |   |   |   |   |
|-------|---|---|---|-------|------|---|---|---|---|---|---|---|---|---|---|---|---|---|---|
| SN049 | 2 | 7 | 3 | 123   | 26   | 1 | 1 | 0 | 0 | 1 | 1 | 0 | 1 | 0 | 0 | 1 | 1 | 0 | 0 |
| SN050 | 2 | 8 | 3 | 124   | 23.5 | 1 | 1 | 0 | 1 | 1 | 1 | 1 | 1 | 0 | 0 | 1 | 1 | 0 | 0 |
| SN051 | 1 | 7 | 3 | 130.5 | 24.5 | 1 | 1 | 0 | 1 | 1 | 1 | 1 | 0 | 0 | 0 | 1 | 1 | 1 | 0 |
| SN052 | 2 | 9 | 3 | 134   | 30   | 1 | 1 | 0 | 1 | 1 | 1 | 1 | 1 | 0 | 0 | 1 | 1 | 1 | 0 |
| SN053 | 2 | 6 | 3 | 111   | 17   | 1 | 1 | 0 | 1 | 1 | 1 | 0 | 1 | 0 | 0 | 1 | 1 | 1 | 0 |
| SN054 | 1 | 6 | 3 | 121.5 | 20   | 1 | 1 | 0 | 1 | 1 | 1 | 1 | 1 | 0 | 1 | 1 | 0 | 1 | 0 |
| SN055 | 1 | 9 | 3 | 135   | 29   | 1 | 1 | 0 | 1 | 1 | 1 | 1 | 0 | 0 | 0 | 1 | 0 | 0 | 0 |
| SN056 | 2 | 9 | 3 | 144.5 | 38   | 1 | 1 | 0 | 1 | 0 | 1 | 1 | 1 | 1 | 0 | 1 | 1 | 1 | 0 |
| SN057 | 1 | 7 | 3 | 129.5 | 29   | 1 | 1 | 0 | 1 | 1 | 1 | 0 | 1 | 0 | 0 | 1 | 1 | 1 | 1 |
| SN058 | 1 | 9 | 3 | 145.5 | 41.5 | 1 | 1 | 0 | 1 | 1 | 1 | 0 | 0 | 0 | 1 | 1 | 1 | 1 | 0 |
| SN059 | 2 | 6 | 3 | 122.5 | 27.5 | 1 | 1 | 0 | 1 | 1 | 1 | 1 | 0 | 0 | 0 | 1 | 1 | 1 | 0 |
| SN060 | 2 | 9 | 3 | 142   | 38   | 1 | 1 | 0 | 1 | 1 | 1 | 1 | 0 | 0 | 0 | 1 | 1 | 1 | 1 |
| SN061 | 1 | 8 | 3 | 128.5 | 31.5 | 1 | 1 | 0 | 1 | 1 | 0 | 1 | 1 | 1 | 0 | 1 | 0 | 0 | 0 |
| SN062 | 1 | 7 | 3 | 124.5 | 23.5 | 1 | 1 | 0 | 1 | 1 | 0 | 1 | 1 | 0 | 0 | 1 | 1 | 0 | 0 |
| SN063 | 1 | 7 | 3 | 129.5 | 29   | 1 | 1 | 0 | 1 | 0 | 1 | 1 | 1 | 0 | 1 | 1 | 1 | 0 | 1 |
| SN064 | 1 | 6 | 3 | 116   | 18.5 | 1 | 1 | 0 | 1 | 1 | 1 | 1 | 1 | 0 | 0 | 1 | 1 | 1 | 0 |
| SN065 | 1 | 8 | 3 | 132   | 35   | 1 | 1 | 0 | 1 | 1 | 1 | 0 | 1 | 0 | 0 | 1 | 1 | 1 | 0 |
| SN066 | 1 | 6 | 3 | 110.5 | 20   | 1 | 1 | 0 | 0 | 1 | 1 | 0 | 1 | 0 | 1 | 1 | 1 | 0 | 0 |
| SN067 | 2 | 6 | 3 | 110.5 | 15   | 1 | 1 | 0 | 0 | 1 | 1 | 0 | 1 | 1 | 0 | 1 | 1 | 0 | 0 |
| SN068 | 2 | 9 | 3 | 150.5 | 44.5 | 1 | 1 | 0 | 1 | 1 | 1 | 1 | 1 | 0 | 0 | 1 | 1 | 1 | 1 |
| SN069 | 2 | 6 | 3 | 119   | 21.5 | 1 | 1 | 0 | 1 | 0 | 1 | 1 | 1 | 0 | 0 | 1 | 1 | 0 | 0 |
| SN070 | 1 | 9 | 3 | 137   | 42.5 | 1 | 1 | 0 | 1 | 1 | 0 | 1 | 1 | 1 | 0 | 1 | 1 | 1 | 0 |
| SN071 | 1 | 7 | 3 | 129.5 | 29   | 1 | 1 | 0 | 0 | 1 | 1 | 1 | 1 | 0 | 0 | 1 | 1 | 1 | 1 |
| SN072 | 1 | 7 | 3 | 128.5 | 31.5 | 1 | 1 | 0 | 0 | 1 | 1 | 0 | 1 | 0 | 0 | 1 | 1 | 0 | 1 |
| SN073 | 2 | 6 | 3 | 108.5 | 14.5 | 1 | 1 | 0 | 1 | 0 | 1 | 0 | 1 | 0 | 0 | 1 | 1 | 0 | 1 |
| SN074 | 1 | 9 | 3 | 130   | 29   | 1 | 1 | 0 | 0 | 1 | 1 | 0 | 1 | 0 | 0 | 1 | 0 | 0 | 1 |
| SN075 | 2 | 6 | 3 | 120   | 22   | 1 | 1 | 0 | 1 | 1 | 0 | 1 | 1 | 0 | 0 | 1 | 0 | 0 | 1 |
| SN076 | 2 | 7 | 3 | 125.5 | 22   | 1 | 1 | 0 | 1 | 1 | 0 | 1 | 1 | 0 | 1 | 1 | 1 | 1 | 0 |
| SN077 | 1 | 9 | 3 | 142   | 42   | 1 | 1 | 0 | 1 | 1 | 0 | 1 | 0 | 0 | 0 | 1 | 0 | 0 | 0 |
| SN078 | 2 | 9 | 3 | 146.5 | 44.5 | 1 | 0 | 0 | 1 | 1 | 0 | 1 | 1 | 0 | 1 | 1 | 0 | 1 | 0 |
| SN079 | 2 | 9 | 3 | 132.5 | 34.5 | 1 | 1 | 1 | 1 | 1 | 1 | 1 | 1 | 0 | 0 | 1 | 0 | 0 | 0 |
| SN080 | 1 | 8 | 3 | 134.5 | 41.5 | 1 | 1 | 0 | 1 | 1 | 1 | 0 | 1 | 0 | 1 | 1 | 0 | 0 | 0 |
| SN081 | 1 | 6 | 3 | 121.5 | 20   | 1 | 1 | 0 | 1 | 1 | 0 | 0 | 1 | 0 | 0 | 1 | 1 | 0 | 0 |
| SN082 | 2 | 6 | 3 | 117   | 21   | 1 | 0 | 0 | 1 | 1 | 0 | 0 | 0 | 0 | 0 | 1 | 0 | 0 | 0 |
| SN083 | 2 | 8 | 3 | 126   | 23.5 | 1 | 1 | 0 | 1 | 1 | 1 | 1 | 0 | 0 | 0 | 1 | 0 | 1 | 0 |
| SN084 | 1 | 6 | 3 | 112   | 17.5 | 1 | 1 | 0 | 1 | 1 | 1 | 1 | 1 | 0 | 1 | 1 | 1 | 1 | 1 |
| SN085 | 1 | 6 | 3 | 118.5 | 22   | 1 | 1 | 0 | 1 | 1 | 1 | 1 | 1 | 0 | 0 | 1 | 0 | 1 | 0 |
| SN086 | 1 | 8 | 3 | 129.5 | 31.5 | 1 | 0 | 0 | 1 | 1 | 1 | 0 | 1 | 0 | 0 | 1 | 1 | 1 | 1 |
| SN087 | 2 | 6 | 3 | 121   | 20   | 1 | 1 | 0 | 1 | 1 | 1 | 0 | 1 | 0 | 1 | 1 | 0 | 1 | 0 |
| SN088 | 1 | 6 | 3 | 115.5 | 20   | 1 | 1 | 0 | 1 | 1 | 1 | 0 | 0 | 0 | 0 | 1 | 1 | 0 | 0 |
| SN089 | 2 | 9 | 3 | 145.5 | 52.5 | 1 | 1 | 0 | 1 | 1 | 1 | 1 | 1 | 0 | 0 | 1 | 1 | 1 | 0 |
| SN090 | 1 | 6 | 3 | 119   | 25   | 1 | 1 | 0 | 1 | 1 | 1 | 1 | 1 | 0 | 0 | 1 | 0 | 0 | 1 |
| SN091 | 1 | 8 | 3 | 127.5 | 30.5 | 1 | 0 | 0 | 0 | 0 | 1 | 0 | 1 | 1 | 1 | 1 | 0 | 0 | 0 |
| SN092 | 2 | 8 | 3 | 127   | 25.5 | 1 | 1 | 0 | 0 | 1 | 1 | 1 | 1 | 0 | 0 | 1 | 0 | 1 | 1 |
| SN093 | 1 | 7 | 3 | 124   | 29.5 | 1 | 1 | 0 | 1 | 0 | 1 | 0 | 1 | 1 | 1 | 1 | 0 | 0 | 0 |
| SN094 | 2 | 6 | 3 | 121.5 | 24   | 1 | 1 | 0 | 0 | 1 | 1 | 0 | 1 | 0 | 1 | 1 | 1 | 0 | 0 |
| SN095 | 2 | 6 | 3 | 117.5 | 21   | 1 | 1 | 0 | 1 | 1 | 1 | 1 | 1 | 0 | 0 | 1 | 0 | 1 | 0 |
| SN096 | 1 | 9 | 3 | 139   | 32.7 | 1 | 1 | 0 | 1 | 1 | 1 | 1 | 1 | 0 | 0 | 1 | 0 | 0 | 0 |
| SN097 | 2 | 7 | 3 | 125.5 | 18   | 1 | 1 | 0 | 1 | 1 | 1 | 0 | 1 | 1 | 0 | 1 | 1 | 1 | 1 |
| SN098 | 2 | 6 | 3 | 117   | 15   | 1 | 1 | 0 | 1 | 1 | 1 | 0 | 1 | 0 | 0 | 1 | 1 | 1 | 0 |
| SN099 | 2 | 7 | 3 | 121.5 | 20   | 1 | 1 | 0 | 1 | 1 | 1 | 0 | 0 | 0 | 1 | 0 | 1 | 1 | 0 |
| SN100 | 1 | 6 | 3 | 119   | 22.5 | 1 | 1 | 0 | 1 | 1 | 1 | 0 | 1 | 0 | 1 | 0 | 1 | 0 | 0 |
| SN101 | 1 | 6 | 3 | 118.5 | 18   | 1 | 1 | 0 | 1 | 1 | 1 | 1 | 1 | 0 | 0 | 1 | 1 | 1 | 1 |
| SN102 | 2 | 6 | 3 | 116.5 | 18   | 1 | 1 | 0 | 1 | 0 | 1 | 0 | 1 | 0 | 1 | 1 | 1 | 0 | 0 |
| SN103 | 2 | 7 | 3 | 125   | 23   | 1 | 0 | 0 | 1 | 0 | 1 | 0 | 1 | 0 | 1 | 1 | 1 | 1 | 0 |
| SN104 | 1 | 6 | 3 | 118   | 22   | 1 | 1 | 0 | 1 | 0 | 1 | 1 | 1 | 1 | 0 | 1 | 1 | 0 | 1 |
| SN105 | 2 | 8 | 3 | 129   | 26.5 | 1 | 1 | 1 | 1 | 1 | 1 | 1 | 1 | 1 | 1 | 1 | 1 | 1 | 1 |
| SN106 | 1 | 9 | 3 | 141   | 34   | 1 | 1 | 1 | 1 | 1 | 1 | 1 | 1 | 0 | 1 | 1 | 1 | 1 | 1 |
| SN107 | 1 | 8 | 3 | 130.5 | 28.5 | 1 | 1 | 0 | 1 | 1 | 1 | 0 | 1 | 0 | 0 | 0 | 1 | 1 | 1 |
| SN108 | 2 | 9 | 3 | 138   | 42   | 1 | 1 | 0 | 1 | 0 | 1 | 1 | 1 | 1 | 0 | 1 | 1 | 1 | 0 |
| SN109 | 2 | 8 | 3 | 132.5 | 26.5 | 1 | 1 | 0 | 1 | 1 | 1 | 0 | 1 | 1 | 0 | 1 | 1 | 0 | 0 |
| SN110 | 2 | 7 | 3 | 124.5 | 19   | 1 | 1 | 0 | 1 | 1 | 1 | 1 | 1 | 0 | 0 | 1 | 1 | 0 | 1 |
| SN111 | 2 | 6 | 3 | 116   | 15   | 1 | 1 | 0 | 1 | 1 | 1 | 1 | 1 | 0 | 0 | 1 | 1 | 0 | 0 |
| SN112 | 2 | 7 | 3 | 123.5 | 21.5 | 1 | 1 | 0 | 1 | 1 | 1 | 0 | 1 | 0 | 1 | 1 | 1 | 0 | 1 |
| SN113 | 1 | 9 | 3 | 147   | 42   | 1 | 1 | 0 | 1 | 1 | 1 | 0 | 0 | 0 | 1 | 1 | 1 | 1 | 0 |
| SN114 | 1 | 7 | 3 | 123.5 | 30.5 | 1 | 1 | 0 | 1 | 1 | 1 | 1 | 1 | 0 | 1 | 1 | 1 | 1 | 0 |
| SN115 | 2 | 9 | 3 | 132   | 31.5 | 1 | 1 | 0 | 1 | 1 | 1 | 0 | 1 | 0 | 0 | 1 | 1 | 0 | 0 |
| SN116 | 1 | 9 | 3 | 131   | 30   | 1 | 1 | 1 | 1 | 1 | 1 | 1 | 1 | 1 | 1 | 1 | 1 | 0 | 1 |
| SN117 | 1 | 9 | 3 | 134.5 | 31.5 | 1 | 1 | 0 | 1 | 1 | 1 | 1 | 0 | 0 | 0 | 1 | 1 | 0 | 0 |

|       |   |   |   |       |      |   |   |   |   |   |   |   |   |   |   |   |   |   |   |
|-------|---|---|---|-------|------|---|---|---|---|---|---|---|---|---|---|---|---|---|---|
| SN118 | 1 | 7 | 3 | 125.5 | 25.5 | 1 | 1 | 0 | 1 | 0 | 1 | 1 | 1 | 0 | 0 | 1 | 0 | 1 | 0 |
| SN119 | 2 | 9 | 3 | 130   | 29.5 | 1 | 1 | 0 | 1 | 1 | 1 | 1 | 1 | 0 | 0 | 1 | 1 | 1 | 0 |
| SN120 | 2 | 6 | 3 | 116   | 22   | 1 | 1 | 0 | 1 | 1 | 1 | 1 | 1 | 0 | 0 | 1 | 1 | 1 | 0 |
| SN121 | 1 | 9 | 3 | 145   | 44   | 1 | 1 | 0 | 1 | 1 | 0 | 0 | 1 | 0 | 1 | 0 | 1 | 1 | 0 |
| SN122 | 2 | 6 | 3 | 119   | 18   | 1 | 1 | 0 | 1 | 1 | 1 | 0 | 1 | 0 | 0 | 0 | 1 | 0 | 0 |
| SN123 | 2 | 8 | 3 | 122.5 | 21.5 | 1 | 1 | 0 | 1 | 1 | 1 | 1 | 0 | 0 | 1 | 1 | 0 | 1 | 1 |
| SN124 | 1 | 6 | 3 | 121.5 | 29   | 1 | 1 | 0 | 1 | 1 | 1 | 0 | 1 | 0 | 1 | 1 | 0 | 0 | 0 |
| SN125 | 2 | 7 | 3 | 121.5 | 23   | 1 | 1 | 0 | 1 | 0 | 0 | 1 | 1 | 0 | 0 | 1 | 1 | 0 | 1 |
| SN126 | 2 | 7 | 3 | 121   | 24   | 1 | 1 | 0 | 1 | 0 | 1 | 0 | 1 | 0 | 0 | 1 | 1 | 1 | 0 |
| SN127 | 2 | 6 | 3 | 117.5 | 22   | 1 | 1 | 1 | 1 | 0 | 1 | 1 | 0 | 1 | 1 | 1 | 1 | 1 | 1 |
| SN128 | 2 | 7 | 3 | 127   | 33   | 1 | 0 | 0 | 0 | 0 | 0 | 0 | 0 | 0 | 0 | 0 | 0 | 0 | 0 |
| SN129 | 2 | 6 | 3 | 122   | 28   | 1 | 1 | 0 | 0 | 0 | 1 | 0 | 0 | 0 | 0 | 1 | 1 | 1 | 1 |
| SN130 | 1 | 8 | 3 | 133.5 | 27.5 | 1 | 1 | 0 | 0 | 0 | 1 | 1 | 1 | 0 | 0 | 1 | 0 | 1 | 0 |
| SN131 | 2 | 6 | 3 | 120   | 25   | 1 | 1 | 0 | 1 | 1 | 1 | 1 | 1 | 0 | 1 | 1 | 1 | 0 | 1 |
| SN132 | 1 | 6 | 3 | 115.5 | 19   | 1 | 1 | 0 | 1 | 1 | 0 | 0 | 0 | 0 | 0 | 1 | 1 | 1 | 0 |
| SN133 | 2 | 8 | 3 | 133   | 22   | 1 | 0 | 0 | 0 | 0 | 0 | 0 | 0 | 0 | 0 | 0 | 0 | 0 | 0 |
| SN134 | 1 | 7 | 3 | 130.5 | 33   | 1 | 0 | 0 | 1 | 0 | 1 | 0 | 1 | 0 | 0 | 0 | 1 | 0 | 0 |
| SN135 | 2 | 9 | 3 | 127.5 | 24.5 | 1 | 1 | 0 | 0 | 0 | 0 | 0 | 1 | 0 | 0 | 1 | 1 | 0 | 0 |
| SN136 | 1 | 9 | 3 | 135   | 23   | 1 | 1 | 0 | 0 | 1 | 1 | 0 | 0 | 0 | 0 | 1 | 1 | 1 | 1 |
| SN137 | 1 | 9 | 3 | 130.5 | 27.5 | 1 | 1 | 0 | 0 | 0 | 0 | 0 | 0 | 0 | 0 | 0 | 0 | 0 | 0 |
| SN138 | 2 | 6 | 3 | 120   | 28.5 | 1 | 1 | 1 | 0 | 0 | 0 | 0 | 1 | 1 | 0 | 0 | 1 | 1 | 0 |
| SN139 | 1 | 6 | 3 | 121   | 26.5 | 1 | 1 | 0 | 0 | 0 | 0 | 0 | 1 | 0 | 0 | 1 | 0 | 0 | 0 |
| SN140 | 1 | 9 | 3 | 141.5 | 41   | 1 | 1 | 0 | 0 | 1 | 1 | 1 | 0 | 0 | 0 | 0 | 0 | 0 | 0 |
| SN141 | 2 | 8 | 3 | 130   | 28   | 1 | 1 | 1 | 1 | 1 | 1 | 1 | 1 | 1 | 1 | 1 | 1 | 1 | 0 |
| SN142 | 2 | 6 | 3 | 127   | 19   | 1 | 1 | 0 | 0 | 0 | 0 | 0 | 1 | 0 | 0 | 0 | 0 | 0 | 0 |
| SN143 | 1 | 7 | 3 | 129.5 | 27   | 1 | 1 | 0 | 1 | 0 | 0 | 1 | 0 | 0 | 0 | 0 | 1 | 0 | 0 |
| SN144 | 1 | 6 | 3 | 119.5 | 21   | 1 | 1 | 0 | 0 | 1 | 0 | 1 | 0 | 1 | 0 | 0 | 1 | 1 | 0 |
| SN145 | 1 | 8 | 3 | 126   | 25.5 | 0 | 1 | 0 | 0 | 0 | 1 | 0 | 0 | 0 | 1 | 1 | 0 | 1 | 0 |
| SN146 | 1 | 7 | 3 | 123   | 29.5 | 1 | 1 | 0 | 1 | 1 | 1 | 1 | 1 | 0 | 0 | 1 | 1 | 1 | 1 |
| SN147 | 2 | 7 | 3 | 131.5 | 24.5 | 0 | 1 | 0 | 0 | 0 | 1 | 0 | 0 | 0 | 0 | 1 | 0 | 1 | 0 |
| SN148 | 1 | 7 | 3 | 125.5 | 24.5 | 1 | 1 | 0 | 1 | 1 | 1 | 1 | 1 | 0 | 0 | 1 | 1 | 0 | 1 |
| SN149 | 2 | 7 | 3 | 119   | 23   | 1 | 1 | 0 | 1 | 1 | 1 | 1 | 0 | 0 | 0 | 1 | 0 | 0 | 0 |
| SN150 | 1 | 9 | 3 | 138   | 31.5 | 1 | 1 | 0 | 1 | 1 | 1 | 1 | 1 | 1 | 0 | 1 | 1 | 0 | 0 |
| SN151 | 2 | 7 | 3 | 127.5 | 19.5 | 1 | 1 | 0 | 1 | 0 | 1 | 0 | 1 | 0 | 0 | 1 | 0 | 0 | 0 |
| SN152 | 2 | 8 | 3 | 138   | 35.5 | 1 | 1 | 0 | 0 | 0 | 1 | 0 | 1 | 0 | 0 | 1 | 1 | 1 | 0 |
| SN153 | 2 | 6 | 3 | 123   | 21.5 | 1 | 1 | 1 | 1 | 1 | 1 | 1 | 1 | 0 | 1 | 1 | 1 | 1 | 0 |
| SN154 | 1 | 7 | 3 | 129   | 25   | 1 | 0 | 0 | 1 | 0 | 1 | 0 | 0 | 0 | 0 | 0 | 0 | 0 | 0 |
| SN155 | 1 | 9 | 3 | 132   | 27.5 | 1 | 1 | 0 | 1 | 0 | 0 | 1 | 0 | 0 | 0 | 0 | 1 | 0 | 0 |
| SN156 | 1 | 6 | 3 | 125.5 | 21.5 | 1 | 0 | 0 | 1 | 0 | 1 | 0 | 0 | 0 | 0 | 0 | 0 | 0 | 0 |
| SN157 | 2 | 7 | 3 | 125.5 | 21   | 1 | 0 | 0 | 1 | 0 | 0 | 0 | 0 | 0 | 0 | 0 | 0 | 0 | 0 |
| SN158 | 2 | 9 | 3 | 140.5 | 38   | 1 | 1 | 0 | 1 | 0 | 0 | 1 | 1 | 0 | 0 | 1 | 1 | 1 | 0 |
| SN159 | 1 | 6 | 3 | 115   | 22   | 1 | 1 | 1 | 0 | 1 | 0 | 0 | 1 | 0 | 0 | 1 | 0 | 0 | 0 |
| SN160 | 2 | 6 | 3 | 112   | 18   | 1 | 0 | 0 | 0 | 1 | 0 | 0 | 0 | 0 | 0 | 0 | 0 | 1 | 0 |
| SN161 | 2 | 6 | 3 | 119   | 18.5 | 1 | 1 | 0 | 1 | 0 | 1 | 0 | 1 | 0 | 0 | 1 | 0 | 0 | 0 |
| SN162 | 2 | 7 | 3 | 117.5 | 18   | 1 | 0 | 0 | 1 | 0 | 1 | 1 | 1 | 0 | 0 | 1 | 1 | 0 | 1 |
| SN163 | 1 | 6 | 3 | 125.5 | 29.5 | 1 | 0 | 0 | 1 | 0 | 1 | 0 | 1 | 0 | 0 | 0 | 1 | 0 | 0 |
| SN164 | 2 | 9 | 3 | 128   | 26.5 | 1 | 1 | 0 | 0 | 0 | 0 | 0 | 0 | 0 | 0 | 0 | 0 | 0 | 0 |
| SN165 | 2 | 8 | 3 | 132.5 | 30   | 1 | 0 | 0 | 0 | 0 | 0 | 0 | 0 | 0 | 0 | 1 | 1 | 1 | 0 |
| SN166 | 2 | 9 | 3 | 131.5 | 30   | 1 | 1 | 0 | 1 | 1 | 1 | 1 | 1 | 1 | 0 | 1 | 1 | 1 | 1 |
| SN167 | 1 | 8 | 3 | 130.5 | 31.5 | 1 | 1 | 0 | 1 | 1 | 1 | 1 | 0 | 0 | 0 | 1 | 0 | 0 | 0 |
| SN168 | 2 | 9 | 3 | 131.5 | 27.5 | 1 | 1 | 1 | 0 | 1 | 1 | 1 | 0 | 0 | 0 | 0 | 0 | 1 | 1 |
| SN169 | 1 | 8 | 3 | 135   | 32.5 | 1 | 1 | 0 | 0 | 1 | 0 | 1 | 1 | 0 | 1 | 0 | 1 | 1 | 0 |
| SN170 | 1 | 8 | 3 | 130   | 25.5 | 1 | 1 | 0 | 0 | 1 | 1 | 0 | 1 | 0 | 0 | 1 | 1 | 0 | 0 |
| SN171 | 2 | 6 | 3 | 126   | 29.5 | 1 | 0 | 0 | 1 | 0 | 1 | 0 | 0 | 0 | 0 | 0 | 0 | 0 | 0 |
| SN172 | 2 | 8 | 3 | 135.5 | 37   | 1 | 1 | 1 | 1 | 1 | 1 | 1 | 1 | 1 | 1 | 1 | 1 | 1 | 1 |
| SN173 | 1 | 6 | 3 | 124.5 | 27.5 | 1 | 1 | 0 | 1 | 0 | 1 | 0 | 1 | 0 | 0 | 1 | 0 | 0 | 0 |
| SN174 | 1 | 8 | 3 | 137.5 | 44   | 1 | 1 | 0 | 0 | 0 | 0 | 0 | 0 | 0 | 1 | 1 | 1 | 0 | 0 |
| SN175 | 2 | 8 | 3 | 134   | 36   | 1 | 1 | 0 | 0 | 0 | 1 | 0 | 0 | 0 | 0 | 1 | 1 | 1 | 0 |
| SN176 | 2 | 7 | 3 | 127   | 24.5 | 1 | 1 | 0 | 0 | 0 | 1 | 0 | 0 | 0 | 0 | 1 | 1 | 1 | 0 |
| SN177 | 2 | 8 | 3 | 138.5 | 29   | 1 | 1 | 0 | 0 | 0 | 1 | 0 | 1 | 0 | 0 | 1 | 0 | 0 | 0 |
| SN178 | 1 | 7 | 3 | 121   | 26.5 | 1 | 1 | 1 | 1 | 1 | 1 | 1 | 1 | 0 | 1 | 1 | 1 | 1 | 1 |
| SN179 | 1 | 8 | 3 | 133.5 | 36   | 1 | 1 | 0 | 1 | 0 | 0 | 1 | 0 | 0 | 0 | 0 | 1 | 0 | 0 |
| SN180 | 2 | 6 | 3 | 116   | 18   | 1 | 0 | 0 | 1 | 0 | 0 | 0 | 0 | 0 | 0 | 0 | 1 | 0 | 0 |
| SN181 | 1 | 9 | 3 | 141   | 40.5 | 1 | 1 | 0 | 1 | 1 | 1 | 1 | 1 | 1 | 1 | 1 | 1 | 1 | 0 |
| SN182 | 2 | 9 | 3 | 139.5 | 40.5 | 1 | 1 | 1 | 0 | 1 | 1 | 1 | 0 | 1 | 1 | 1 | 1 | 1 | 1 |
| SN183 | 2 | 9 | 3 | 135   | 29   | 1 | 0 | 0 | 1 | 0 | 1 | 0 | 1 | 0 | 0 | 0 | 1 | 0 | 0 |
| SN184 | 1 | 7 | 3 | 121   | 25.5 | 1 | 1 | 0 | 1 | 1 | 1 | 1 | 0 | 0 | 0 | 1 | 0 | 0 | 0 |
| XZ001 | 2 | 7 | 4 | 125   | 26   | 1 | 1 | 0 | 1 | 1 | 1 | 1 | 1 | 0 | 1 | 0 | 1 | 1 | 0 |
| XZ002 | 2 | 8 | 4 | 129.5 | 26.5 | 1 | 0 | 0 | 1 | 0 | 1 | 0 | 1 | 0 | 0 | 0 | 1 | 0 | 0 |



|       |   |   |   |       |      |   |   |   |   |   |   |   |   |   |   |   |   |   |   |
|-------|---|---|---|-------|------|---|---|---|---|---|---|---|---|---|---|---|---|---|---|
| XZ003 | 2 | 6 | 4 | 123.5 | 25.5 | 1 | 1 | 0 | 1 | 0 | 0 | 1 | 0 | 0 | 0 | 0 | 1 | 0 | 0 |
| XZ004 | 1 | 8 | 4 | 126.5 | 24   | 1 | 1 | 0 | 1 | 1 | 1 | 1 | 1 | 0 | 0 | 0 | 1 | 0 | 0 |
| XZ005 | 1 | 8 | 4 | 133.5 | 20.5 | 1 | 1 | 0 | 1 | 1 | 1 | 1 | 0 | 0 | 0 | 1 | 0 | 0 | 1 |
| XZ006 | 2 | 8 | 4 | 132   | 26.5 | 1 | 1 | 0 | 1 | 1 | 1 | 1 | 0 | 0 | 0 | 0 | 0 | 0 | 1 |
| XZ007 | 2 | 8 | 4 | 125   | 26.5 | 0 | 1 | 0 | 1 | 1 | 1 | 1 | 0 | 0 | 0 | 1 | 1 | 1 | 0 |
| XZ008 | 1 | 6 | 4 | 122.5 | 29   | 1 | 1 | 0 | 0 | 1 | 1 | 1 | 1 | 0 | 0 | 0 | 1 | 1 | 1 |
| XZ009 | 1 | 6 | 4 | 122   | 22.5 | 1 | 1 | 1 | 1 | 1 | 1 | 0 | 1 | 0 | 0 | 0 | 1 | 0 | 1 |
| XZ010 | 2 | 9 | 4 | 144   | 28   | 1 | 1 | 0 | 0 | 0 | 0 | 0 | 1 | 0 | 0 | 1 | 1 | 1 | 0 |
| XZ011 | 1 | 9 | 4 | 142   | 28   | 1 | 1 | 1 | 0 | 0 | 1 | 1 | 1 | 0 | 0 | 1 | 1 | 1 | 0 |
| XZ012 | 2 | 7 | 4 | 126.5 | 24   | 1 | 1 | 0 | 0 | 0 | 1 | 1 | 1 | 0 | 0 | 1 | 1 | 1 | 1 |
| XZ013 | 1 | 8 | 4 | 136   | 28.5 | 1 | 1 | 0 | 0 | 1 | 0 | 1 | 1 | 1 | 1 | 0 | 0 | 0 | 0 |
| XZ014 | 2 | 8 | 4 | 135.5 | 33.5 | 1 | 1 | 1 | 0 | 1 | 0 | 1 | 1 | 0 | 0 | 1 | 1 | 1 | 1 |
| XZ015 | 1 | 8 | 4 | 135   | 29.5 | 1 | 1 | 1 | 0 | 1 | 1 | 1 | 0 | 0 | 0 | 1 | 1 | 1 | 0 |
| XZ016 | 1 | 9 | 4 | 139   | 28   | 1 | 1 | 1 | 1 | 0 | 1 | 1 | 1 | 1 | 0 | 1 | 1 | 0 | 1 |
| XZ017 | 2 | 7 | 4 | 128.5 | 31   | 1 | 1 | 1 | 0 | 0 | 0 | 1 | 1 | 0 | 0 | 1 | 1 | 1 | 1 |
| XZ018 | 1 | 7 | 4 | 133   | 26   | 1 | 1 | 0 | 0 | 1 | 1 | 1 | 1 | 1 | 0 | 1 | 1 | 1 | 0 |
| XZ019 | 1 | 8 | 4 | 133   | 31   | 1 | 1 | 1 | 1 | 1 | 1 | 0 | 0 | 1 | 0 | 1 | 1 | 0 | 1 |
| XZ020 | 1 | 7 | 4 | 127.5 | 25   | 1 | 1 | 1 | 1 | 1 | 1 | 1 | 1 | 0 | 0 | 0 | 1 | 0 | 1 |
| XZ021 | 2 | 8 | 4 | 136   | 26.5 | 1 | 1 | 0 | 0 | 1 | 0 | 1 | 1 | 0 | 0 | 1 | 1 | 1 | 0 |
| XZ022 | 2 | 7 | 4 | 129.5 | 25   | 1 | 1 | 1 | 0 | 1 | 0 | 0 | 1 | 0 | 0 | 1 | 0 | 0 | 0 |
| XZ023 | 1 | 7 | 4 | 133   | 26   | 0 | 1 | 0 | 0 | 1 | 0 | 1 | 0 | 0 | 0 | 1 | 1 | 1 | 0 |
| XZ024 | 1 | 6 | 4 | 127.5 | 29   | 1 | 1 | 0 | 1 | 1 | 1 | 0 | 0 | 0 | 0 | 1 | 1 | 1 | 1 |
| XZ025 | 2 | 6 | 4 | 127   | 26   | 0 | 1 | 0 | 1 | 1 | 1 | 0 | 1 | 0 | 1 | 1 | 1 | 1 | 0 |
| XZ026 | 1 | 9 | 4 | 136   | 36   | 1 | 1 | 0 | 0 | 1 | 1 | 1 | 1 | 0 | 0 | 1 | 1 | 1 | 0 |
| XZ027 | 1 | 7 | 4 | 129.5 | 29   | 0 | 1 | 0 | 0 | 0 | 1 | 0 | 1 | 0 | 0 | 1 | 1 | 1 | 1 |
| XZ028 | 2 | 8 | 4 | 133   | 30   | 1 | 1 | 0 | 1 | 0 | 0 | 1 | 1 | 0 | 0 | 1 | 0 | 1 | 0 |
| XZ029 | 2 | 7 | 4 | 129.5 | 25.5 | 0 | 0 | 0 | 0 | 1 | 1 | 0 | 0 | 0 | 0 | 1 | 0 | 1 | 0 |
| XZ030 | 1 | 6 | 4 | 126.5 | 26.5 | 0 | 1 | 1 | 1 | 0 | 0 | 0 | 0 | 0 | 0 | 1 | 1 | 1 | 0 |
| XZ031 | 1 | 9 | 4 | 139   | 35   | 0 | 1 | 0 | 0 | 0 | 1 | 0 | 0 | 0 | 0 | 1 | 0 | 1 | 0 |
| XZ032 | 2 | 9 | 4 | 144   | 30   | 1 | 1 | 1 | 0 | 1 | 1 | 1 | 0 | 0 | 0 | 0 | 0 | 1 | 1 |
| XZ033 | 2 | 6 | 4 | 120   | 19   | 1 | 0 | 0 | 0 | 0 | 0 | 0 | 0 | 0 | 0 | 1 | 1 | 1 | 0 |
| XZ034 | 2 | 9 | 4 | 146.5 | 35   | 1 | 1 | 0 | 0 | 0 | 1 | 1 | 0 | 0 | 0 | 1 | 1 | 1 | 1 |
| XZ035 | 1 | 8 | 4 | 136.5 | 34.3 | 1 | 1 | 0 | 0 | 0 | 1 | 0 | 1 | 0 | 0 | 1 | 1 | 0 | 0 |
| XZ036 | 1 | 6 | 4 | 124.5 | 23.5 | 1 | 1 | 0 | 0 | 0 | 1 | 0 | 0 | 0 | 0 | 1 | 1 | 1 | 1 |
| XZ037 | 2 | 8 | 4 | 136   | 27.5 | 1 | 1 | 0 | 0 | 0 | 1 | 0 | 0 | 1 | 1 | 1 | 1 | 1 | 1 |
| XZ038 | 2 | 9 | 4 | 144.5 | 32.5 | 1 | 1 | 0 | 1 | 0 | 1 | 1 | 0 | 1 | 0 | 1 | 1 | 1 | 0 |
| XZ039 | 2 | 9 | 4 | 140.5 | 29.5 | 1 | 1 | 0 | 0 | 1 | 1 | 0 | 1 | 0 | 0 | 1 | 1 | 0 | 1 |
| XZ040 | 1 | 7 | 4 | 137.5 | 34   | 1 | 1 | 0 | 0 | 1 | 0 | 0 | 1 | 1 | 0 | 0 | 1 | 0 | 1 |
| XZ041 | 2 | 9 | 4 | 145.5 | 28.5 | 1 | 1 | 1 | 1 | 0 | 0 | 1 | 1 | 0 | 0 | 0 | 1 | 1 | 1 |
| XZ042 | 2 | 9 | 4 | 149   | 34.5 | 1 | 1 | 0 | 0 | 0 | 0 | 1 | 1 | 1 | 0 | 1 | 1 | 1 | 0 |
| XZ043 | 2 | 9 | 4 | 152.5 | 34.5 | 1 | 1 | 1 | 0 | 0 | 1 | 0 | 1 | 0 | 0 | 1 | 1 | 0 | 1 |
| XZ044 | 2 | 9 | 4 | 137.5 | 26.5 | 1 | 1 | 0 | 0 | 1 | 1 | 1 | 1 | 0 | 1 | 1 | 1 | 1 | 1 |
| XZ045 | 1 | 7 | 4 | 131.5 | 27.5 | 1 | 1 | 0 | 0 | 1 | 0 | 1 | 1 | 0 | 0 | 1 | 1 | 1 | 1 |
| XZ046 | 2 | 8 | 4 | 126.5 | 24.5 | 1 | 1 | 0 | 0 | 1 | 1 | 1 | 1 | 0 | 1 | 1 | 1 | 1 | 1 |
| XZ047 | 2 | 6 | 4 | 121   | 21.5 | 1 | 1 | 0 | 0 | 0 | 0 | 0 | 1 | 0 | 0 | 1 | 1 | 0 | 0 |
| XZ048 | 1 | 9 | 4 | 139   | 39.5 | 1 | 1 | 1 | 1 | 1 | 1 | 0 | 1 | 1 | 1 | 1 | 1 | 1 | 1 |
| XZ049 | 1 | 8 | 4 | 129   | 29   | 1 | 1 | 1 | 1 | 1 | 1 | 1 | 1 | 0 | 1 | 0 | 1 | 1 | 0 |
| XZ050 | 1 | 6 | 4 | 117   | 20   | 1 | 0 | 0 | 1 | 1 | 0 | 0 | 0 | 0 | 0 | 0 | 0 | 0 | 0 |
| XZ051 | 1 | 7 | 4 | 121   | 25.5 | 1 | 1 | 0 | 1 | 1 | 1 | 0 | 1 | 0 | 1 | 1 | 1 | 1 | 1 |
| XZ052 | 2 | 8 | 4 | 127   | 26   | 1 | 1 | 0 | 1 | 0 | 1 | 0 | 1 | 0 | 0 | 1 | 0 | 0 | 0 |
| XZ053 | 2 | 9 | 4 | 130   | 25   | 1 | 0 | 0 | 0 | 0 | 0 | 0 | 0 | 0 | 0 | 0 | 0 | 0 | 0 |
| XZ054 | 1 | 6 | 4 | 121.5 | 19   | 1 | 0 | 0 | 0 | 0 | 0 | 0 | 1 | 0 | 0 | 0 | 1 | 0 | 1 |
| XZ055 | 1 | 7 | 4 | 123   | 28   | 1 | 1 | 0 | 0 | 0 | 0 | 0 | 1 | 0 | 0 | 1 | 1 | 1 | 0 |
| XZ056 | 2 | 7 | 4 | 128.5 | 23.5 | 1 | 1 | 0 | 0 | 0 | 1 | 1 | 1 | 0 | 0 | 0 | 1 | 0 | 1 |
| XZ057 | 2 | 7 | 4 | 125.5 | 29   | 1 | 1 | 0 | 1 | 0 | 1 | 0 | 1 | 0 | 1 | 0 | 1 | 0 | 0 |
| XZ058 | 1 | 6 | 4 | 112.5 | 20   | 1 | 1 | 0 | 0 | 0 | 1 | 0 | 1 | 0 | 0 | 1 | 0 | 0 | 0 |
| XZ059 | 2 | 8 | 4 | 127.5 | 30.5 | 1 | 1 | 0 | 1 | 0 | 1 | 1 | 1 | 1 | 1 | 1 | 1 | 1 | 1 |
| XZ060 | 2 | 7 | 4 | 128.5 | 24   | 1 | 1 | 0 | 1 | 0 | 0 | 1 | 1 | 0 | 0 | 1 | 0 | 1 | 0 |
| XZ061 | 1 | 8 | 4 | 130   | 28   | 1 | 1 | 0 | 0 | 0 | 1 | 0 | 0 | 0 | 0 | 0 | 1 | 0 | 0 |
| XZ062 | 2 | 6 | 4 | 123   | 29   | 1 | 1 | 0 | 0 | 0 | 0 | 0 | 0 | 0 | 0 | 1 | 0 | 0 | 0 |
| XZ063 | 1 | 6 | 4 | 123.5 | 25.5 | 1 | 1 | 0 | 0 | 0 | 0 | 0 | 0 | 0 | 0 | 1 | 0 | 0 | 0 |
| XZ064 | 1 | 6 | 4 | 122   | 20   | 0 | 0 | 0 | 0 | 0 | 0 | 0 | 0 | 0 | 0 | 0 | 0 | 0 | 0 |
| XZ065 | 1 | 8 | 4 | 132   | 32   | 1 | 0 | 0 | 1 | 0 | 1 | 0 | 0 | 0 | 0 | 0 | 0 | 0 | 0 |
| XZ066 | 2 | 6 | 4 | 123   | 19   | 1 | 1 | 0 | 1 | 0 | 0 | 1 | 0 | 0 | 0 | 0 | 1 | 0 | 0 |
| XZ067 | 1 | 6 | 4 | 119.5 | 23   | 0 | 0 | 0 | 0 | 0 | 0 | 0 | 0 | 0 | 0 | 0 | 0 | 0 | 0 |
| XZ068 | 2 | 7 | 4 | 127.5 | 29.5 | 1 | 0 | 0 | 1 | 0 | 1 | 0 | 0 | 0 | 0 | 0 | 1 | 0 | 0 |
| XZ069 | 1 | 6 | 4 | 117   | 22   | 1 | 1 | 0 | 1 | 1 | 1 | 1 | 1 | 1 | 1 | 1 | 1 | 1 | 0 |
| XZ070 | 2 | 7 | 4 | 129.5 | 37.5 | 1 | 1 | 0 | 0 | 0 | 1 | 0 | 1 | 0 | 0 | 1 | 1 | 0 | 0 |
| XZ071 | 2 | 7 | 4 | 126.5 | 31.5 | 1 | 1 | 0 | 0 | 0 | 1 | 1 | 1 | 0 | 0 | 0 | 1 | 1 | 0 |

|       |   |   |   |       |      |   |   |   |   |   |   |   |   |   |   |   |   |   |   |
|-------|---|---|---|-------|------|---|---|---|---|---|---|---|---|---|---|---|---|---|---|
| XZ072 | 1 | 7 | 4 | 125.5 | 23.5 | 1 | 1 | 0 | 1 | 1 | 1 | 1 | 0 | 0 | 0 | 1 | 1 | 1 | 0 |
| XZ073 | 1 | 6 | 4 | 124   | 28   | 0 | 0 | 0 | 0 | 0 | 0 | 0 | 0 | 0 | 0 | 0 | 0 | 0 | 0 |
| XZ074 | 1 | 7 | 4 | 120   | 24   | 1 | 1 | 0 | 1 | 0 | 1 | 1 | 1 | 1 | 0 | 1 | 1 | 1 | 0 |
| XZ075 | 1 | 8 | 4 | 128   | 27.5 | 1 | 1 | 0 | 1 | 0 | 1 | 1 | 1 | 1 | 1 | 1 | 0 | 1 | 1 |
| XZ076 | 1 | 8 | 4 | 144   | 29.5 | 1 | 1 | 1 | 1 | 1 | 1 | 1 | 1 | 0 | 1 | 1 | 1 | 1 | 1 |
| XZ077 | 2 | 7 | 4 | 124.5 | 22   | 1 | 1 | 1 | 1 | 1 | 1 | 1 | 1 | 1 | 0 | 1 | 1 | 0 | 0 |
| XZ078 | 1 | 6 | 4 | 117.5 | 24   | 1 | 1 | 0 | 0 | 1 | 0 | 1 | 1 | 1 | 0 | 0 | 0 | 0 | 0 |
| XZ079 | 1 | 7 | 4 | 124.5 | 27   | 0 | 1 | 0 | 0 | 0 | 0 | 0 | 0 | 0 | 0 | 0 | 0 | 0 | 0 |
| XZ080 | 2 | 9 | 4 | 142.5 | 36.5 | 1 | 1 | 0 | 0 | 0 | 1 | 0 | 1 | 0 | 0 | 1 | 1 | 1 | 0 |
| XZ081 | 2 | 6 | 4 | 114   | 18   | 1 | 0 | 0 | 1 | 1 | 0 | 0 | 0 | 0 | 0 | 1 | 0 | 0 | 0 |
| XZ082 | 1 | 7 | 4 | 124.5 | 24   | 0 | 0 | 0 | 0 | 0 | 0 | 0 | 0 | 0 | 0 | 0 | 0 | 0 | 0 |
| XZ083 | 2 | 6 | 4 | 122   | 24   | 1 | 1 | 0 | 1 | 0 | 1 | 1 | 1 | 1 | 1 | 1 | 1 | 1 | 1 |
| XZ084 | 2 | 8 | 4 | 123.5 | 25   | 1 | 1 | 0 | 0 | 0 | 1 | 0 | 1 | 0 | 0 | 0 | 1 | 0 | 0 |
| XZ085 | 1 | 9 | 4 | 136   | 36   | 1 | 1 | 0 | 0 | 1 | 1 | 1 | 1 | 0 | 0 | 1 | 1 | 1 | 0 |
| XZ086 | 2 | 8 | 4 | 126   | 27.5 | 1 | 1 | 0 | 0 | 0 | 1 | 0 | 0 | 0 | 0 | 0 | 1 | 0 | 0 |
| XZ087 | 2 | 6 | 4 | 110   | 17.5 | 0 | 0 | 0 | 0 | 0 | 0 | 0 | 0 | 0 | 0 | 0 | 0 | 0 | 0 |
| XZ088 | 2 | 8 | 4 | 121   | 23.5 | 1 | 1 | 1 | 1 | 1 | 1 | 1 | 1 | 1 | 0 | 1 | 1 | 1 | 1 |
| XZ089 | 1 | 7 | 4 | 128.5 | 27.5 | 1 | 1 | 0 | 0 | 0 | 0 | 0 | 1 | 0 | 0 | 1 | 1 | 1 | 0 |
| XZ090 | 2 | 6 | 4 | 119   | 18   | 0 | 1 | 0 | 0 | 0 | 0 | 0 | 0 | 0 | 0 | 0 | 0 | 0 | 0 |
| XZ091 | 2 | 7 | 4 | 123.5 | 26.5 | 1 | 1 | 1 | 1 | 1 | 1 | 1 | 1 | 0 | 0 | 1 | 1 | 1 | 0 |
| XZ092 | 2 | 6 | 4 | 111   | 16   | 0 | 0 | 0 | 0 | 0 | 0 | 0 | 0 | 0 | 0 | 0 | 0 | 0 | 0 |
| XZ093 | 2 | 7 | 4 | 126.5 | 28   | 1 | 1 | 0 | 0 | 0 | 0 | 0 | 1 | 1 | 0 | 0 | 1 | 0 | 1 |
| XZ094 | 2 | 7 | 4 | 126.5 | 20.5 | 1 | 1 | 0 | 0 | 0 | 1 | 0 | 1 | 0 | 0 | 1 | 0 | 0 | 0 |
| XZ095 | 1 | 7 | 4 | 130.5 | 26.5 | 0 | 0 | 0 | 0 | 0 | 0 | 0 | 0 | 0 | 0 | 0 | 0 | 0 | 0 |
| XZ096 | 1 | 7 | 4 | 126   | 24   | 1 | 1 | 0 | 0 | 1 | 0 | 0 | 0 | 0 | 0 | 1 | 0 | 1 | 1 |
| XZ097 | 1 | 8 | 4 | 128.5 | 24   | 1 | 0 | 0 | 0 | 0 | 0 | 0 | 0 | 0 | 0 | 0 | 0 | 0 | 0 |
| XZ098 | 1 | 8 | 4 | 129.5 | 28   | 1 | 1 | 0 | 0 | 0 | 1 | 0 | 1 | 0 | 0 | 1 | 1 | 0 | 1 |
| XZ099 | 1 | 7 | 4 | 131.5 | 28   | 1 | 1 | 0 | 0 | 1 | 0 | 1 | 1 | 0 | 0 | 1 | 1 | 1 | 1 |
| XZ100 | 1 | 8 | 4 | 136.5 | 34   | 1 | 1 | 0 | 0 | 0 | 0 | 0 | 0 | 0 | 0 | 0 | 0 | 0 | 0 |
| XZ101 | 2 | 9 | 4 | 138.5 | 36.5 | 1 | 1 | 1 | 1 | 1 | 1 | 1 | 1 | 1 | 1 | 1 | 1 | 1 | 1 |
| XZ102 | 2 | 9 | 4 | 141.5 | 34.5 | 0 | 1 | 0 | 0 | 0 | 1 | 0 | 1 | 0 | 0 | 1 | 1 | 1 | 1 |
| XZ103 | 2 | 7 | 4 | 123.5 | 23   | 1 | 0 | 0 | 1 | 1 | 0 | 0 | 0 | 0 | 0 | 0 | 0 | 0 | 0 |
| XZ104 | 2 | 9 | 4 | 135.5 | 35   | 1 | 1 | 1 | 1 | 1 | 1 | 1 | 1 | 0 | 1 | 1 | 0 | 1 | 1 |
| XZ105 | 1 | 9 | 4 | 146   | 32   | 1 | 1 | 0 | 0 | 0 | 0 | 0 | 0 | 0 | 0 | 1 | 1 | 0 | 0 |
| XZ106 | 1 | 8 | 4 | 134   | 33.5 | 1 | 1 | 1 | 0 | 1 | 1 | 0 | 1 | 1 | 0 | 1 | 1 | 1 | 0 |
| XZ107 | 1 | 6 | 4 | 119.5 | 20   | 1 | 1 | 0 | 1 | 0 | 0 | 1 | 0 | 0 | 0 | 1 | 1 | 0 | 0 |
| XZ108 | 2 | 9 | 4 | 137   | 38   | 1 | 1 | 0 | 0 | 0 | 0 | 0 | 0 | 0 | 0 | 0 | 0 | 0 | 0 |
| XZ109 | 2 | 9 | 4 | 128.5 | 29.5 | 1 | 1 | 1 | 1 | 1 | 1 | 1 | 1 | 1 | 1 | 1 | 1 | 1 | 0 |
| XZ110 | 1 | 6 | 4 | 118.5 | 21   | 0 | 0 | 0 | 0 | 0 | 0 | 0 | 0 | 0 | 0 | 0 | 0 | 0 | 0 |
| XZ111 | 2 | 8 | 4 | 134.5 | 27   | 1 | 1 | 0 | 1 | 1 | 1 | 1 | 1 | 0 | 1 | 1 | 1 | 1 | 0 |
| XZ112 | 2 | 7 | 4 | 125.5 | 23   | 1 | 1 | 0 | 1 | 0 | 0 | 1 | 0 | 0 | 0 | 0 | 1 | 0 | 0 |
| XZ113 | 1 | 8 | 4 | 129   | 28.5 | 1 | 0 | 0 | 1 | 1 | 0 | 0 | 0 | 0 | 0 | 0 | 0 | 0 | 0 |
| XZ114 | 1 | 7 | 4 | 127.5 | 28   | 1 | 1 | 0 | 0 | 1 | 0 | 0 | 0 | 0 | 0 | 1 | 1 | 0 | 0 |
| XZ115 | 1 | 9 | 4 | 131   | 29.5 | 1 | 1 | 1 | 1 | 1 | 1 | 1 | 1 | 0 | 1 | 1 | 1 | 1 | 0 |
| XZ116 | 2 | 8 | 4 | 127.5 | 25.5 | 1 | 0 | 0 | 0 | 0 | 0 | 0 | 0 | 0 | 0 | 0 | 0 | 0 | 0 |
| XZ117 | 1 | 7 | 4 | 128.5 | 30   | 0 | 0 | 0 | 0 | 1 | 1 | 0 | 0 | 0 | 0 | 1 | 0 | 1 | 0 |
| XZ118 | 2 | 7 | 4 | 125.5 | 25.5 | 1 | 1 | 0 | 0 | 1 | 0 | 1 | 1 | 1 | 0 | 0 | 1 | 1 | 0 |
| XZ119 | 2 | 7 | 4 | 126   | 29   | 1 | 1 | 0 | 0 | 1 | 1 | 0 | 1 | 0 | 0 | 1 | 1 | 0 | 0 |
| XZ120 | 2 | 8 | 4 | 139   | 31   | 1 | 1 | 0 | 0 | 1 | 1 | 1 | 0 | 0 | 0 | 0 | 0 | 0 | 0 |
| XZ121 | 2 | 7 | 4 | 127.5 | 29   | 0 | 0 | 0 | 0 | 0 | 0 | 0 | 0 | 0 | 0 | 0 | 0 | 0 | 0 |
| XZ122 | 2 | 6 | 4 | 120   | 22   | 0 | 1 | 0 | 0 | 0 | 0 | 0 | 0 | 0 | 0 | 0 | 0 | 0 | 0 |
| XZ123 | 2 | 6 | 4 | 121   | 21   | 1 | 1 | 0 | 0 | 1 | 1 | 1 | 0 | 0 | 0 | 1 | 0 | 1 | 0 |
| XZ124 | 2 | 7 | 4 | 125.5 | 23.5 | 1 | 1 | 0 | 0 | 1 | 1 | 1 | 0 | 0 | 0 | 0 | 0 | 0 | 0 |
| XZ125 | 1 | 8 | 4 | 137   | 37   | 1 | 1 | 0 | 0 | 0 | 1 | 0 | 0 | 0 | 0 | 1 | 0 | 0 | 0 |
| XZ126 | 2 | 9 | 4 | 136   | 34   | 1 | 1 | 0 | 1 | 0 | 0 | 1 | 0 | 0 | 0 | 1 | 0 | 1 | 1 |
| XZ127 | 2 | 7 | 4 | 128.5 | 22.5 | 1 | 1 | 0 | 0 | 1 | 1 | 0 | 1 | 0 | 0 | 1 | 1 | 0 | 1 |
| XZ128 | 1 | 8 | 4 | 128.5 | 29   | 1 | 1 | 0 | 0 | 1 | 0 | 0 | 1 | 0 | 0 | 1 | 1 | 1 | 0 |
| XZ129 | 1 | 6 | 4 | 116   | 19   | 1 | 1 | 0 | 1 | 1 | 1 | 0 | 0 | 0 | 1 | 1 | 1 | 1 | 1 |
| XZ130 | 2 | 6 | 4 | 122   | 21   | 1 | 1 | 0 | 0 | 0 | 1 | 0 | 0 | 0 | 0 | 1 | 1 | 1 | 0 |
| XZ131 | 1 | 6 | 4 | 123.5 | 30.5 | 1 | 0 | 0 | 0 | 0 | 0 | 0 | 0 | 0 | 0 | 0 | 0 | 0 | 0 |
| XZ132 | 1 | 8 | 4 | 136   | 44   | 1 | 0 | 0 | 1 | 0 | 0 | 0 | 0 | 0 | 0 | 0 | 0 | 0 | 0 |
| XZ133 | 1 | 7 | 4 | 126.5 | 23.5 | 0 | 1 | 0 | 0 | 0 | 0 | 0 | 0 | 0 | 0 | 0 | 0 | 0 | 0 |
| XZ134 | 1 | 6 | 4 | 122.5 | 30   | 1 | 1 | 0 | 0 | 0 | 0 | 0 | 0 | 0 | 0 | 0 | 0 | 0 | 0 |
| XZ135 | 1 | 9 | 4 | 139   | 32   | 1 | 1 | 0 | 1 | 1 | 0 | 0 | 1 | 0 | 0 | 1 | 1 | 0 | 0 |
| XZ136 | 1 | 6 | 4 | 121.5 | 24.5 | 1 | 1 | 1 | 0 | 0 | 0 | 1 | 0 | 1 | 1 | 1 | 1 | 1 | 0 |
| XZ137 | 1 | 9 | 4 | 139.5 | 39.5 | 1 | 1 | 0 | 0 | 0 | 0 | 0 | 0 | 0 | 0 | 0 | 0 | 0 | 0 |
| XZ138 | 2 | 8 | 4 | 135.5 | 27.5 | 1 | 0 | 0 | 1 | 1 | 0 | 0 | 0 | 0 | 0 | 0 | 0 | 0 | 0 |
| XZ139 | 2 | 8 | 4 | 135.5 | 32.5 | 1 | 1 | 0 | 0 | 0 | 1 | 0 | 1 | 0 | 0 | 1 | 0 | 0 | 0 |
| XZ140 | 1 | 7 | 4 | 127.5 | 26   | 1 | 1 | 0 | 1 | 0 | 0 | 1 | 1 | 0 | 0 | 1 | 1 | 0 | 0 |

|       |   |   |   |       |      |   |   |   |   |   |   |   |   |   |   |   |   |   |   |
|-------|---|---|---|-------|------|---|---|---|---|---|---|---|---|---|---|---|---|---|---|
| XZ141 | 2 | 6 | 4 | 122   | 23.5 | 1 | 1 | 0 | 1 | 1 | 1 | 1 | 1 | 0 | 1 | 1 | 1 | 1 | 1 |
| XZ142 | 1 | 9 | 4 | 137   | 30   | 1 | 1 | 0 | 0 | 1 | 0 | 0 | 0 | 0 | 0 | 1 | 0 | 1 | 1 |
| XZ143 | 1 | 9 | 4 | 151   | 45   | 1 | 1 | 0 | 1 | 1 | 1 | 1 | 1 | 1 | 1 | 1 | 1 | 1 | 0 |
| XZ144 | 2 | 7 | 4 | 125.5 | 23   | 1 | 1 | 0 | 0 | 1 | 1 | 1 | 1 | 0 | 1 | 1 | 0 | 0 | 0 |
| XZ145 | 1 | 7 | 4 | 127.5 | 30.5 | 1 | 1 | 0 | 1 | 1 | 0 | 0 | 0 | 0 | 0 | 1 | 1 | 1 | 0 |
| XZ146 | 1 | 9 | 4 | 130   | 24   | 1 | 1 | 0 | 0 | 1 | 1 | 0 | 1 | 0 | 0 | 1 | 1 | 0 | 0 |
| XZ147 | 2 | 9 | 4 | 136   | 28.5 | 1 | 1 | 0 | 0 | 0 | 0 | 0 | 0 | 0 | 0 | 0 | 0 | 0 | 0 |
| XZ148 | 1 | 9 | 4 | 136   | 32   | 1 | 1 | 0 | 1 | 1 | 0 | 1 | 1 | 1 | 1 | 0 | 0 | 1 | 0 |
| XZ149 | 2 | 6 | 4 | 126   | 23   | 1 | 1 | 0 | 0 | 1 | 1 | 1 | 1 | 0 | 1 | 1 | 0 | 0 | 0 |
| XZ150 | 1 | 6 | 4 | 123.5 | 28.5 | 1 | 1 | 0 | 0 | 0 | 0 | 0 | 0 | 0 | 0 | 0 | 0 | 0 | 0 |
| XZ151 | 1 | 6 | 4 | 124.5 | 30   | 1 | 1 | 0 | 0 | 1 | 0 | 0 | 1 | 0 | 0 | 1 | 1 | 1 | 0 |
| XZ152 | 2 | 8 | 4 | 139   | 31   | 1 | 1 | 0 | 1 | 1 | 0 | 0 | 1 | 0 | 0 | 0 | 1 | 0 | 1 |
| XZ153 | 1 | 9 | 4 | 147   | 41.5 | 1 | 1 | 1 | 1 | 1 | 1 | 1 | 1 | 1 | 1 | 1 | 1 | 1 | 0 |
| XZ154 | 1 | 6 | 4 | 124.5 | 27   | 1 | 1 | 0 | 0 | 0 | 0 | 0 | 0 | 0 | 0 | 0 | 0 | 0 | 0 |
| XZ155 | 1 | 6 | 4 | 120.5 | 23   | 0 | 0 | 0 | 0 | 0 | 0 | 0 | 0 | 0 | 0 | 0 | 0 | 0 | 0 |
| XZ156 | 1 | 6 | 4 | 119.5 | 20.5 | 1 | 1 | 0 | 0 | 1 | 1 | 1 | 0 | 0 | 0 | 0 | 0 | 0 | 0 |
| XZ157 | 2 | 9 | 4 | 136.5 | 34   | 1 | 1 | 1 | 1 | 1 | 1 | 0 | 1 | 1 | 0 | 1 | 1 | 1 | 0 |
| XZ158 | 1 | 7 | 4 | 115   | 22.5 | 1 | 1 | 0 | 0 | 1 | 1 | 0 | 1 | 0 | 0 | 1 | 0 | 0 | 1 |
| XZ159 | 2 | 7 | 4 | 129.5 | 24.5 | 1 | 1 | 0 | 1 | 1 | 1 | 1 | 1 | 1 | 1 | 1 | 1 | 1 | 0 |
| XZ160 | 1 | 7 | 4 | 125.5 | 24   | 1 | 1 | 0 | 0 | 1 | 1 | 0 | 0 | 0 | 0 | 0 | 1 | 0 | 0 |
| XZ161 | 1 | 6 | 4 | 117   | 22   | 1 | 1 | 0 | 1 | 0 | 1 | 1 | 1 | 1 | 1 | 1 | 1 | 1 | 0 |
| XZ162 | 1 | 9 | 4 | 144   | 36   | 1 | 1 | 1 | 1 | 1 | 1 | 1 | 1 | 1 | 1 | 1 | 1 | 1 | 0 |
| XZ163 | 1 | 8 | 4 | 139.5 | 36   | 1 | 1 | 0 | 1 | 0 | 1 | 0 | 1 | 0 | 0 | 1 | 0 | 0 | 0 |
| XZ164 | 1 | 6 | 4 | 119.5 | 22.5 | 1 | 1 | 1 | 0 | 1 | 1 | 1 | 0 | 1 | 1 | 1 | 1 | 1 | 0 |
| XZ165 | 1 | 7 | 4 | 127.5 | 27   | 1 | 1 | 0 | 1 | 0 | 1 | 0 | 0 | 0 | 0 | 1 | 1 | 1 | 0 |
| XZ166 | 1 | 7 | 4 | 125.5 | 22   | 0 | 1 | 0 | 1 | 0 | 0 | 1 | 0 | 0 | 0 | 0 | 1 | 1 | 1 |
| XZ167 | 2 | 6 | 4 | 118   | 27   | 1 | 0 | 0 | 0 | 0 | 1 | 0 | 1 | 1 | 1 | 1 | 0 | 0 | 0 |
| XZ168 | 2 | 8 | 4 | 126.5 | 27.5 | 1 | 1 | 0 | 1 | 1 | 1 | 1 | 0 | 1 | 0 | 1 | 1 | 0 | 1 |
| XZ169 | 2 | 6 | 4 | 124   | 22.2 | 1 | 1 | 0 | 0 | 0 | 0 | 0 | 0 | 0 | 0 | 0 | 0 | 0 | 0 |
| XZ170 | 2 | 8 | 4 | 140   | 34   | 1 | 1 | 1 | 1 | 1 | 1 | 1 | 1 | 0 | 1 | 1 | 1 | 1 | 1 |
| XZ171 | 1 | 9 | 4 | 148   | 48.5 | 1 | 1 | 1 | 1 | 1 | 1 | 1 | 1 | 1 | 1 | 1 | 1 | 1 | 1 |
| XZ172 | 2 | 8 | 4 | 133.5 | 25.5 | 1 | 1 | 0 | 1 | 0 | 1 | 1 | 1 | 1 | 0 | 1 | 0 | 0 | 0 |
| XZ173 | 2 | 9 | 4 | 138.5 | 31   | 1 | 0 | 0 | 1 | 1 | 0 | 0 | 0 | 0 | 1 | 1 | 1 | 1 | 1 |
| XZ174 | 2 | 7 | 4 | 125.5 | 28.5 | 1 | 1 | 0 | 0 | 0 | 0 | 0 | 0 | 0 | 0 | 1 | 0 | 0 | 0 |
| XZ175 | 2 | 6 | 4 | 119   | 19.5 | 1 | 1 | 0 | 1 | 0 | 0 | 1 | 1 | 0 | 0 | 1 | 1 | 0 | 0 |
| XZ176 | 1 | 6 | 4 | 120   | 19.5 | 1 | 1 | 0 | 0 | 0 | 0 | 0 | 1 | 0 | 0 | 1 | 1 | 0 | 0 |
| XZ177 | 1 | 9 | 4 | 142   | 35   | 1 | 1 | 1 | 1 | 1 | 1 | 1 | 1 | 1 | 1 | 1 | 1 | 1 | 1 |
| XZ178 | 2 | 9 | 4 | 134   | 25   | 1 | 1 | 1 | 1 | 1 | 0 | 1 | 1 | 1 | 0 | 1 | 1 | 1 | 0 |
| XZ179 | 2 | 6 | 4 | 120   | 23   | 1 | 1 | 0 | 1 | 0 | 0 | 1 | 0 | 0 | 0 | 1 | 0 | 1 | 1 |
| XZ180 | 1 | 8 | 4 | 136   | 31   | 1 | 1 | 0 | 0 | 1 | 1 | 1 | 0 | 0 | 0 | 1 | 0 | 1 | 0 |
| XZ181 | 1 | 7 | 4 | 124.5 | 26.5 | 1 | 1 | 0 | 1 | 0 | 0 | 1 | 0 | 0 | 0 | 1 | 1 | 0 | 0 |
| XZ182 | 2 | 6 | 4 | 112   | 19   | 0 | 1 | 0 | 0 | 1 | 0 | 0 | 0 | 1 | 0 | 0 | 0 | 0 | 0 |
| XZ183 | 2 | 7 | 4 | 127   | 22.5 | 1 | 1 | 0 | 1 | 0 | 0 | 1 | 1 | 0 | 0 | 1 | 0 | 1 | 0 |
| XZ184 | 2 | 8 | 4 | 137   | 29   | 1 | 1 | 0 | 0 | 0 | 1 | 0 | 1 | 0 | 0 | 1 | 0 | 0 | 0 |
| XZ185 | 1 | 6 | 4 | 122.5 | 25.5 | 1 | 1 | 0 | 0 | 1 | 1 | 1 | 0 | 0 | 0 | 1 | 0 | 1 | 0 |
| XZ186 | 1 | 6 | 4 | 116.5 | 21.5 | 1 | 1 | 0 | 0 | 1 | 0 | 0 | 0 | 0 | 0 | 0 | 0 | 0 | 0 |
| XZ187 | 1 | 6 | 4 | 120   | 23   | 1 | 1 | 0 | 0 | 0 | 1 | 0 | 0 | 0 | 0 | 1 | 1 | 0 | 0 |
