# Supplementary figures and images for: Assessment of Validity of Children’s Movement Skill Quotient (CMSQ) Based on the Physical Education Classroom Environment
Source: Hindawi journal article supplement (doi:10.1155/2020/8938763), 2020-01-01

Photos of the CMSQ test video

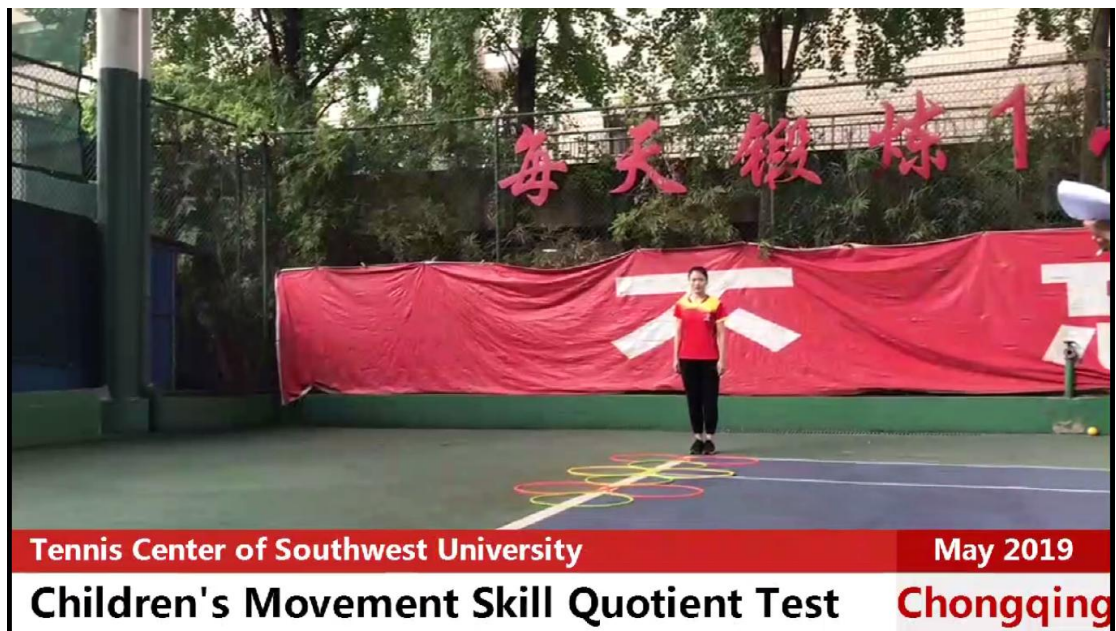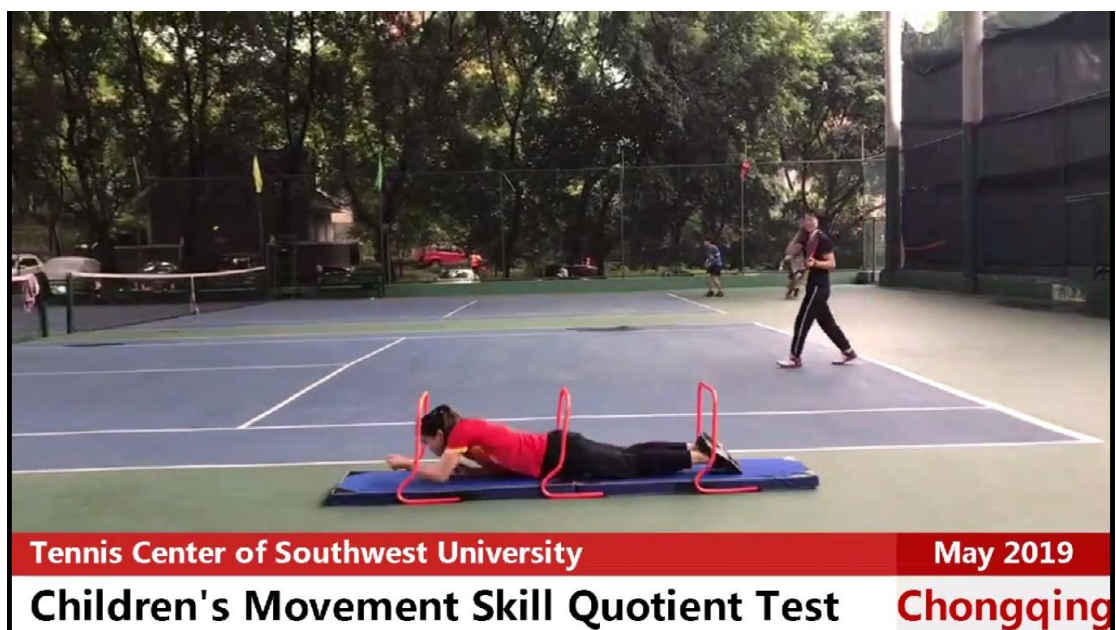

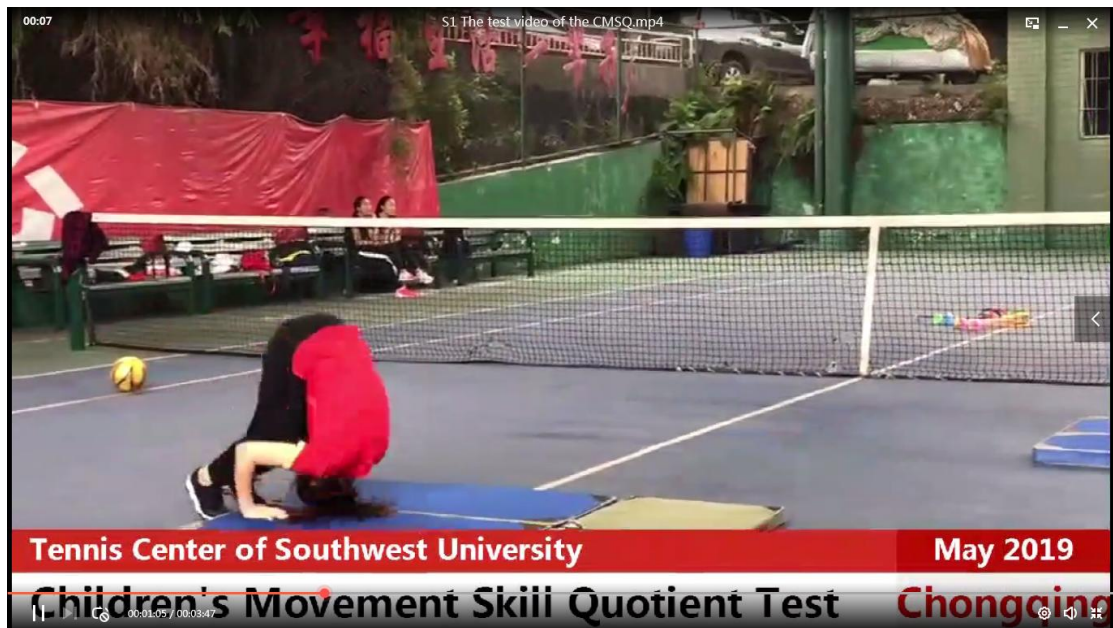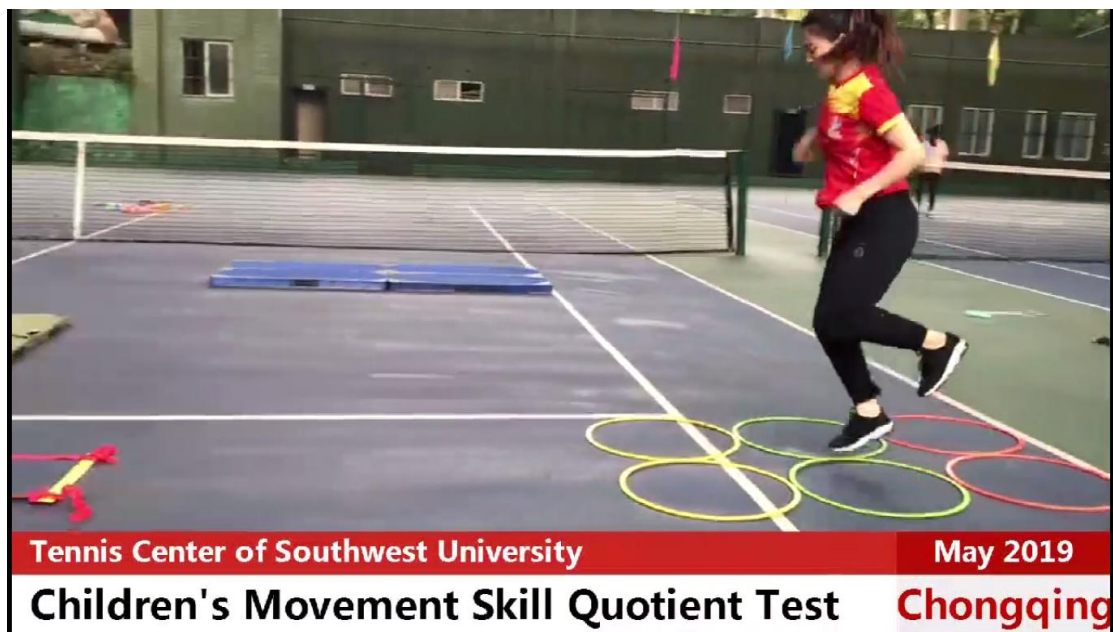

Supplement: f1 [file 8938763.f1.zip]
